# Supplementary material for: Beneficial Effects of Mifepristone Treatment in Patients with Breast Cancer Selected by the Progesterone Receptor Isoform Ratio: Results from the MIPRA Trial
Source: PubMed Central journal article supplement — Clin Cancer Res. 2022 Oct 21;29(5):866–77. doi: 10.1158/1078-0432.CCR-22-2060 (PMC9975668; doi:10.1158/1078-0432.ccr-22-2060), 2022-10-21
Supplement: ccr-22-2060_supplementary_figure_s1_supps1.pdf [file ccr-22-2060_supplementary_figure_s1_supps1.pdf]

**A**

| Patient | CNB  |      |          | S    |      |          |
|---------|------|------|----------|------|------|----------|
|         | Nuc* | Cyt* | Nuc/Cyt# | Nuc* | Cyt* | Nuc/Cyt# |
|         |      |      |          |      |      |          |
| M009    |      |      |          |      |      |          |
| M019    |      |      |          |      |      |          |
| M023    |      |      |          |      |      |          |
| M026    |      |      |          |      |      |          |
| M042    |      |      |          |      |      |          |
| M044L   |      |      |          |      |      |          |
| M044R   |      |      |          |      |      |          |
| M049    |      |      |          |      |      |          |
| M055    |      |      |          |      |      |          |
| M062    |      |      |          |      |      |          |
| M070    |      |      |          |      |      |          |
| M073    |      |      |          |      |      |          |
| M077    |      |      |          |      |      |          |
| M090    |      |      |          |      |      |          |
| M094    |      |      |          |      |      |          |
| M095    |      |      |          |      |      |          |
| M096    |      |      |          |      |      |          |
| M105    |      |      |          |      |      |          |
| M118    |      |      |          |      |      |          |
| M124    |      |      |          |      |      |          |
| M140    |      |      |          |      |      |          |

PRA-H       Nuc/Cyt ≤1  
 PRB-H       Nuc/Cyt ≥1  
 Equimolar       Nuc ≈ Cyt  
 Not determined

**B**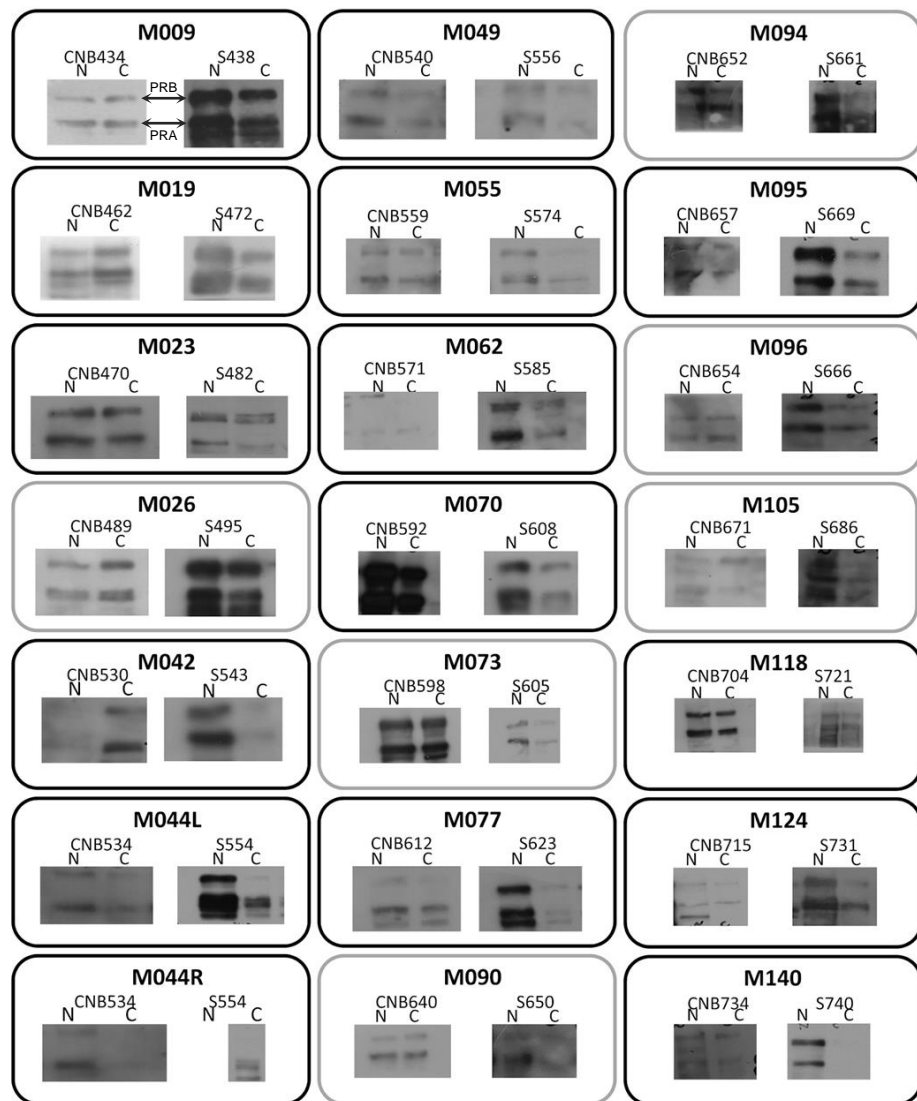

**Supplementary Figure S1. A**, Prevailing PR isoforms before and after mifepristone treatment and their prevailing nuclear (Nuc) or cytosolic (Cyt) localization in western blot studies. \*: Prevailing PR isoforms in Western blot studies; #: Distribution of PR in the Nuc or Cyt compartments; CNB: Core needle biopsy, S: Surgical sample. In grey font: Mifepristone unresponsive tumors by Ki67 criteria. **B**, Representative western blots of CNB and surgical samples from all patients. The upper band is PRB and the lower band PRA, as labeled in the first set.
