# Supplementary material for: Beneficial Effects of Mifepristone Treatment in Patients with Breast Cancer Selected by the Progesterone Receptor Isoform Ratio: Results from the MIPRA Trial
Source: PubMed Central journal article supplement — Clin Cancer Res. 2022 Oct 21;29(5):866–77. doi: 10.1158/1078-0432.CCR-22-2060 (PMC9975668; doi:10.1158/1078-0432.ccr-22-2060), 2022-10-21
Supplement: ccr-22-2060_supplementary_figure_s2_supps2.pdf [file ccr-22-2060_supplementary_figure_s2_supps2.pdf]

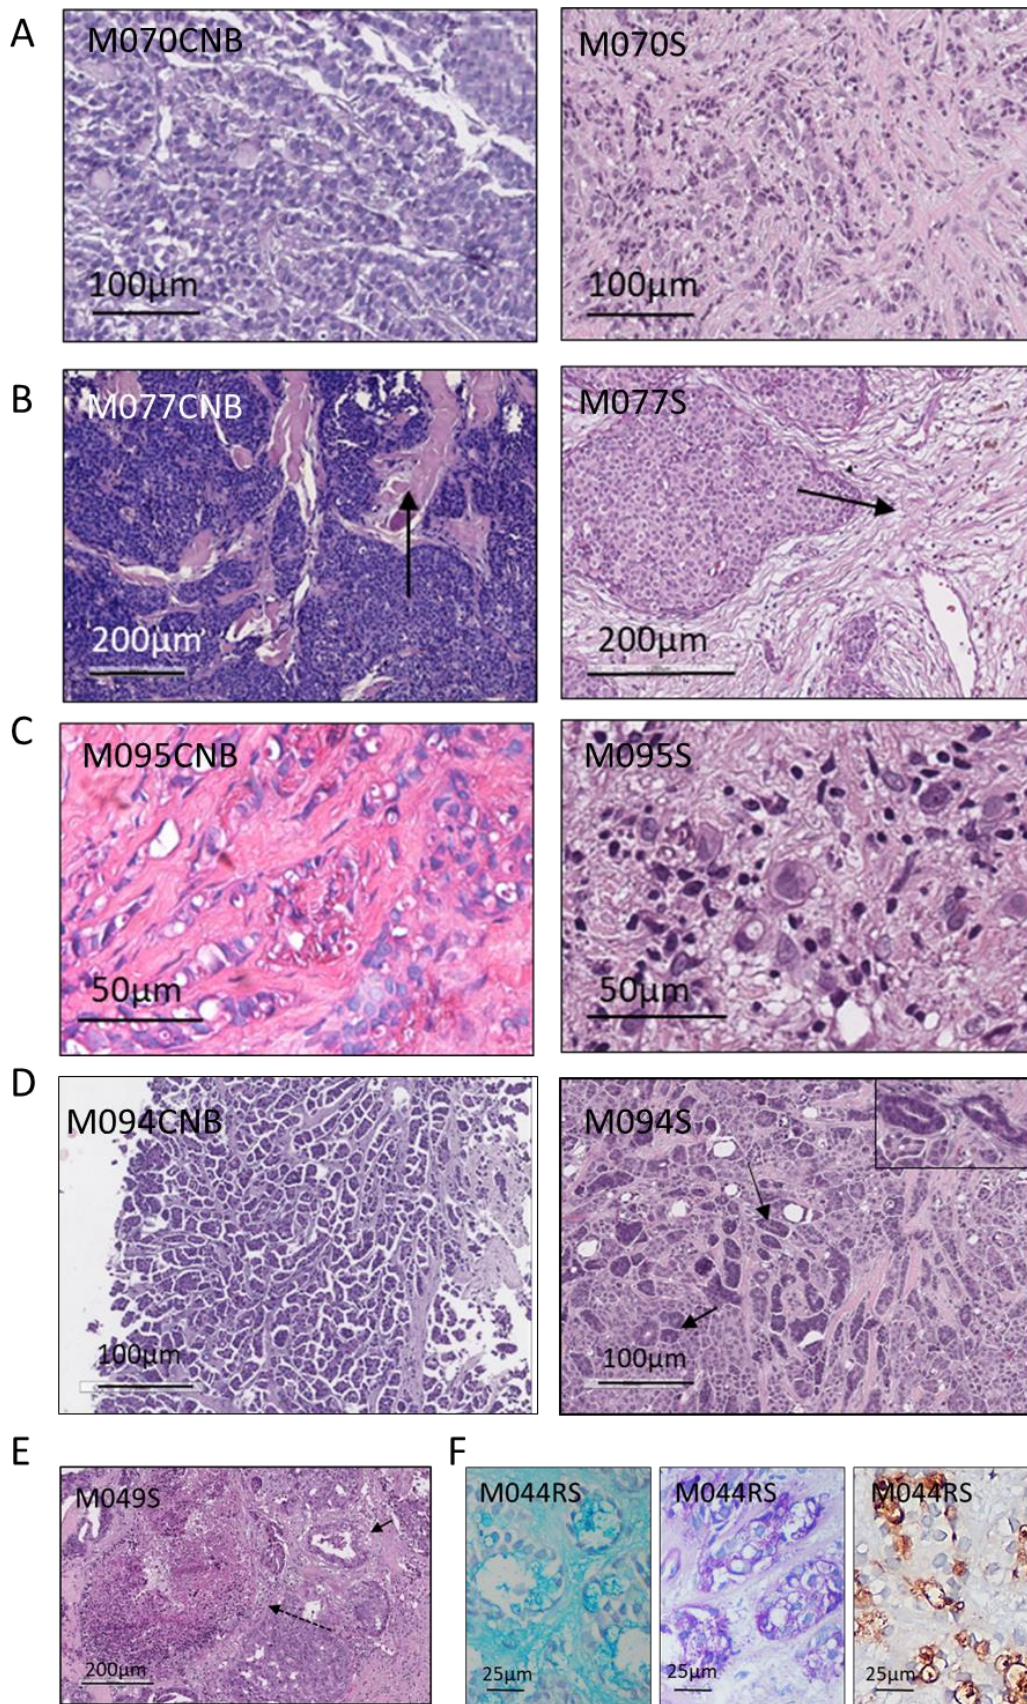

**Supplementary Figure S2.** Morphological features after mifepristone treatment. **A-D**, Images illustrating increased stromal tissue (**A**), thin and scarce collagen fibers, and increased stromal matrix (arrow; **B**), an area of tissue remodeling (**C**), and an area of increased differentiation (**D**) observed in the surgical samples (S) compared to the respective core needle biopsies (CNB). **E**, Image illustrates an area of necrosis (dotted arrow) together with a differentiated structure (black arrow) in a surgical sample. **F**, Cells with Alcian blue+ (left), PAS+ (middle) and MUC-1+ (immunohistochemistry; right) vacuoles observed in a mifepristone-treated tumor. Inset: High power field of a differentiated gland/duct.
