# Supplementary material for: Beneficial Effects of Mifepristone Treatment in Patients with Breast Cancer Selected by the Progesterone Receptor Isoform Ratio: Results from the MIPRA Trial
Source: PubMed Central journal article supplement — Clin Cancer Res. 2022 Oct 21;29(5):866–77. doi: 10.1158/1078-0432.CCR-22-2060 (PMC9975668; doi:10.1158/1078-0432.ccr-22-2060), 2022-10-21
Supplement: ccr-22-2060_supplementary_figure_s3_supps3.pdf [file ccr-22-2060_supplementary_figure_s3_supps3.pdf]

**A**

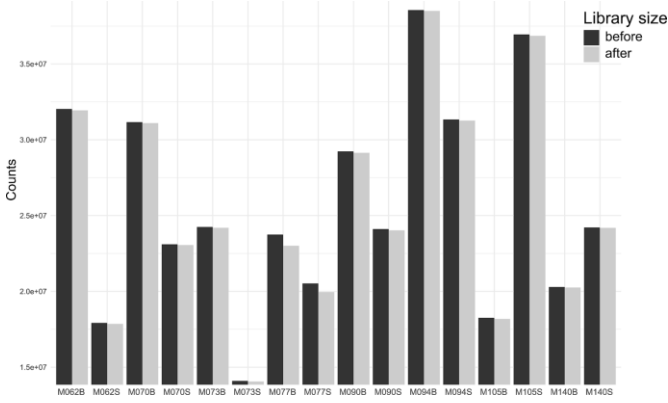

**B**

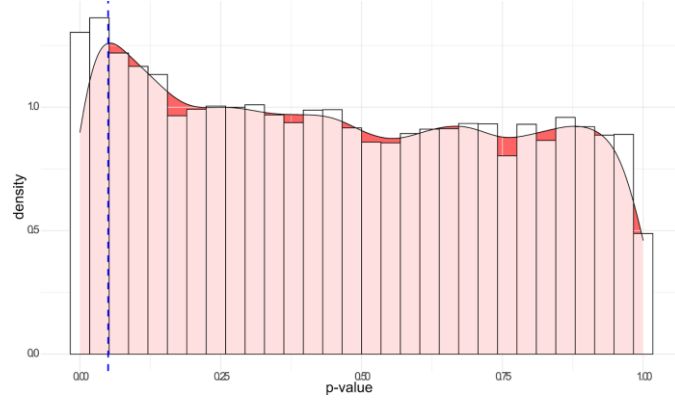

**C**

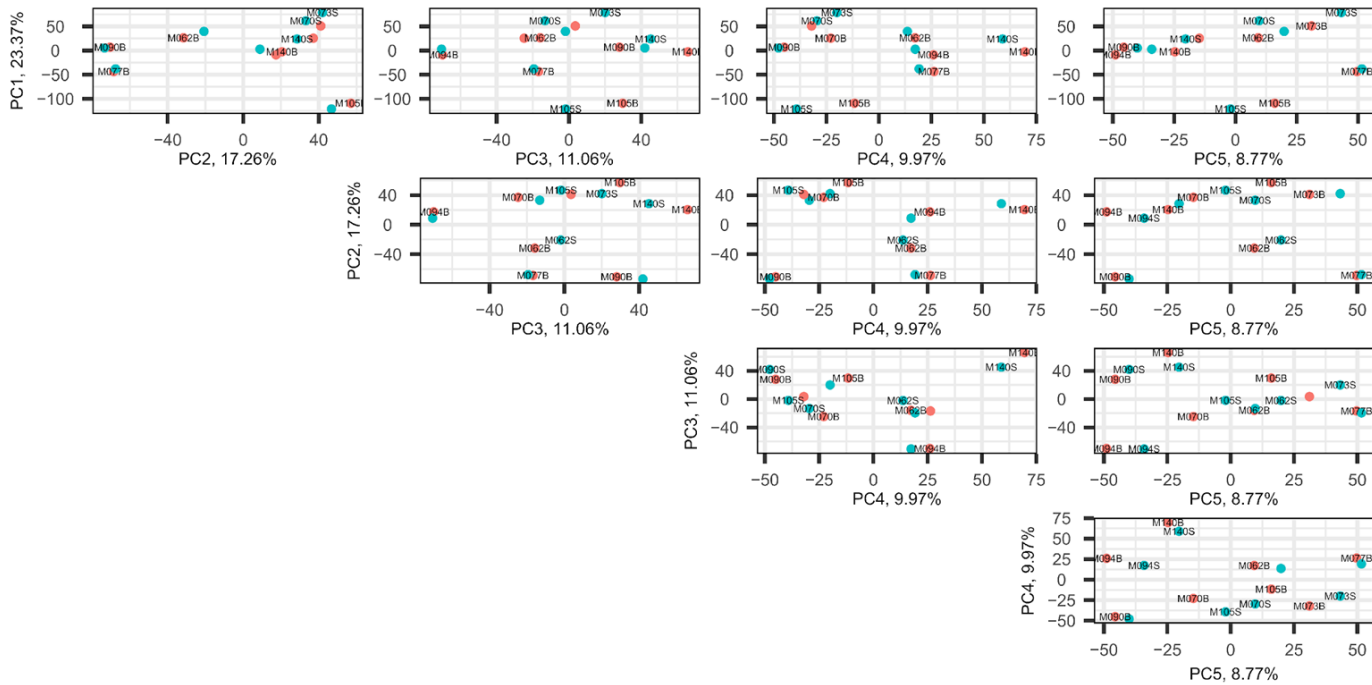

**Supplementary Figure S3. A**, Library size before and after low count filtering. **B**, P-value histogram distribution observed in the differential expression analysis. **C**, Pairwise scatter plots of the first five principal components from the principal component analysis of RNA-Seq data.
