# Supplementary material for: Beneficial Effects of Mifepristone Treatment in Patients with Breast Cancer Selected by the Progesterone Receptor Isoform Ratio: Results from the MIPRA Trial
Source: PubMed Central journal article supplement — Clin Cancer Res. 2022 Oct 21;29(5):866–77. doi: 10.1158/1078-0432.CCR-22-2060 (PMC9975668; doi:10.1158/1078-0432.ccr-22-2060), 2022-10-21
Supplement: ccr-22-2060_supplementary_figure_s5_supps5.pdf [file ccr-22-2060_supplementary_figure_s5_supps5.pdf]

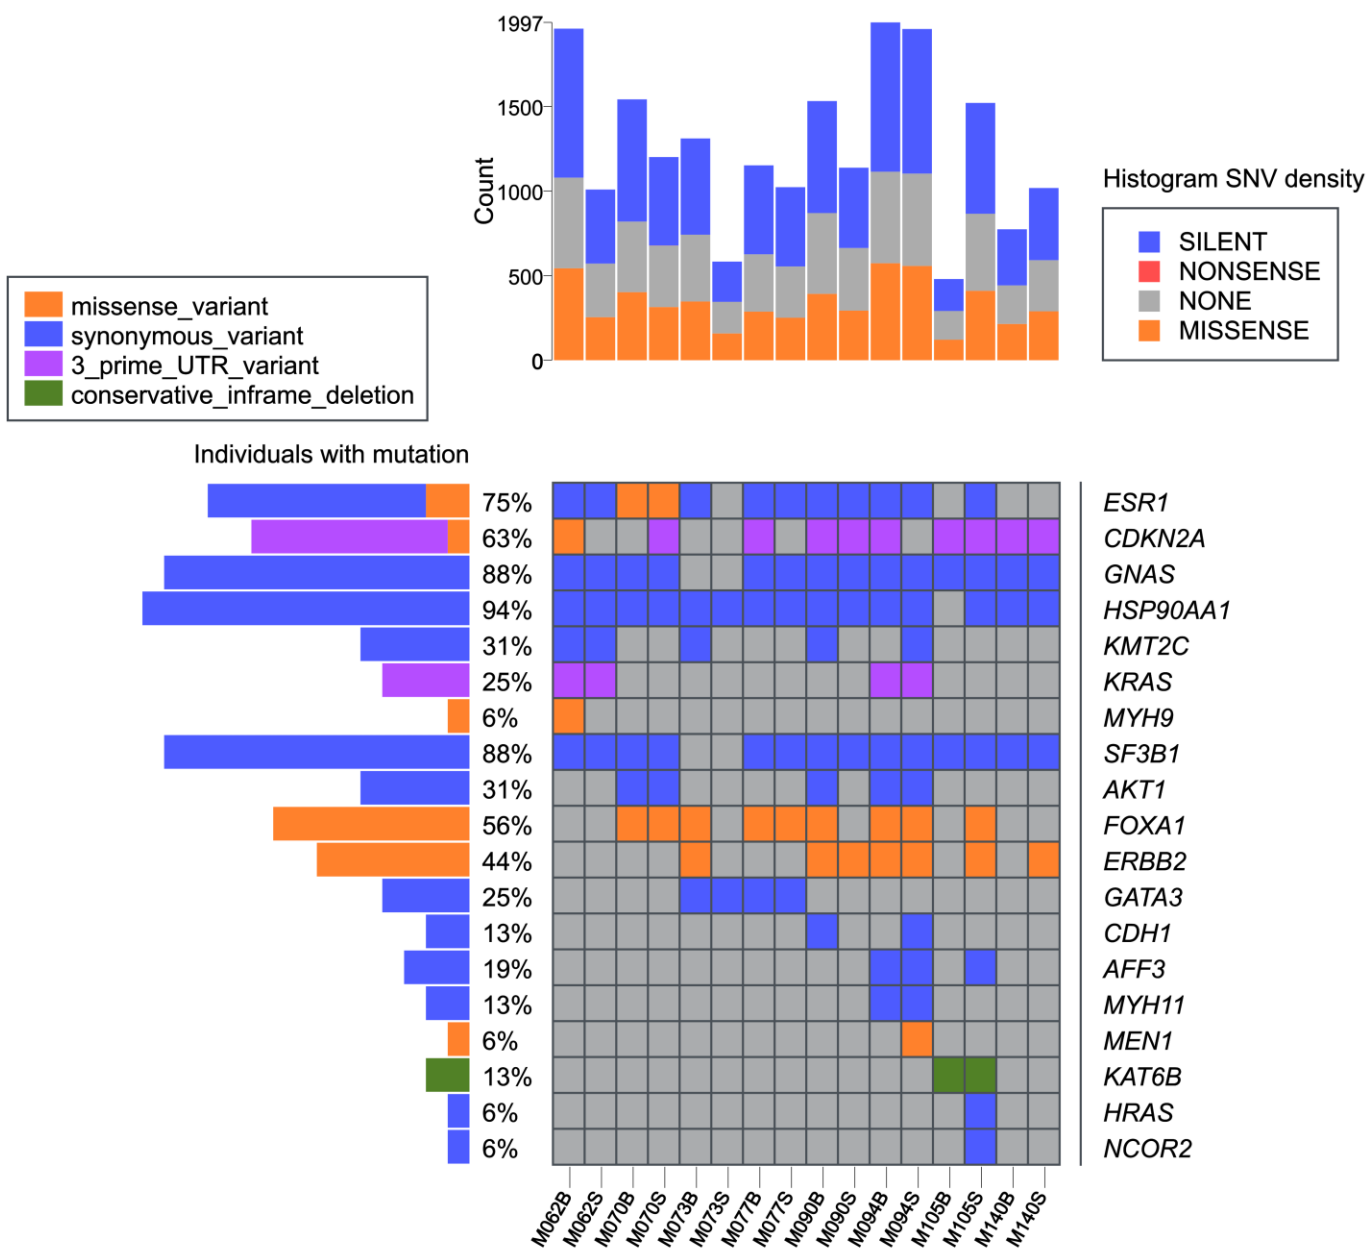

**Supplementary Figure S5. Mutations identified in RNA-Seq analysis.** The data obtained in RNA-Seq studies were graphed using the Oviz-Bio tool (<https://academic.oup.com/nar/article/48/W1/W415/5835823>). Only driver breast cancer genes (99) were selected from the Intogene data base (<https://www.intogen.org/download>) and we found mutations in 19 driver genes after read depth filtering (DP >50). Of note is the missense mutation found in ESR1 in the M070 patient. Left, Percentage of samples with mutations. Color defines the type of mutations.
