# Supplementary material for: Beneficial Effects of Mifepristone Treatment in Patients with Breast Cancer Selected by the Progesterone Receptor Isoform Ratio: Results from the MIPRA Trial
Source: PubMed Central journal article supplement — Clin Cancer Res. 2022 Oct 21;29(5):866–77. doi: 10.1158/1078-0432.CCR-22-2060 (PMC9975668; doi:10.1158/1078-0432.ccr-22-2060), 2022-10-21
Supplement: ccr-22-2060_supplementary_figure_s6_supps6.pdf [file ccr-22-2060_supplementary_figure_s6_supps6.pdf]

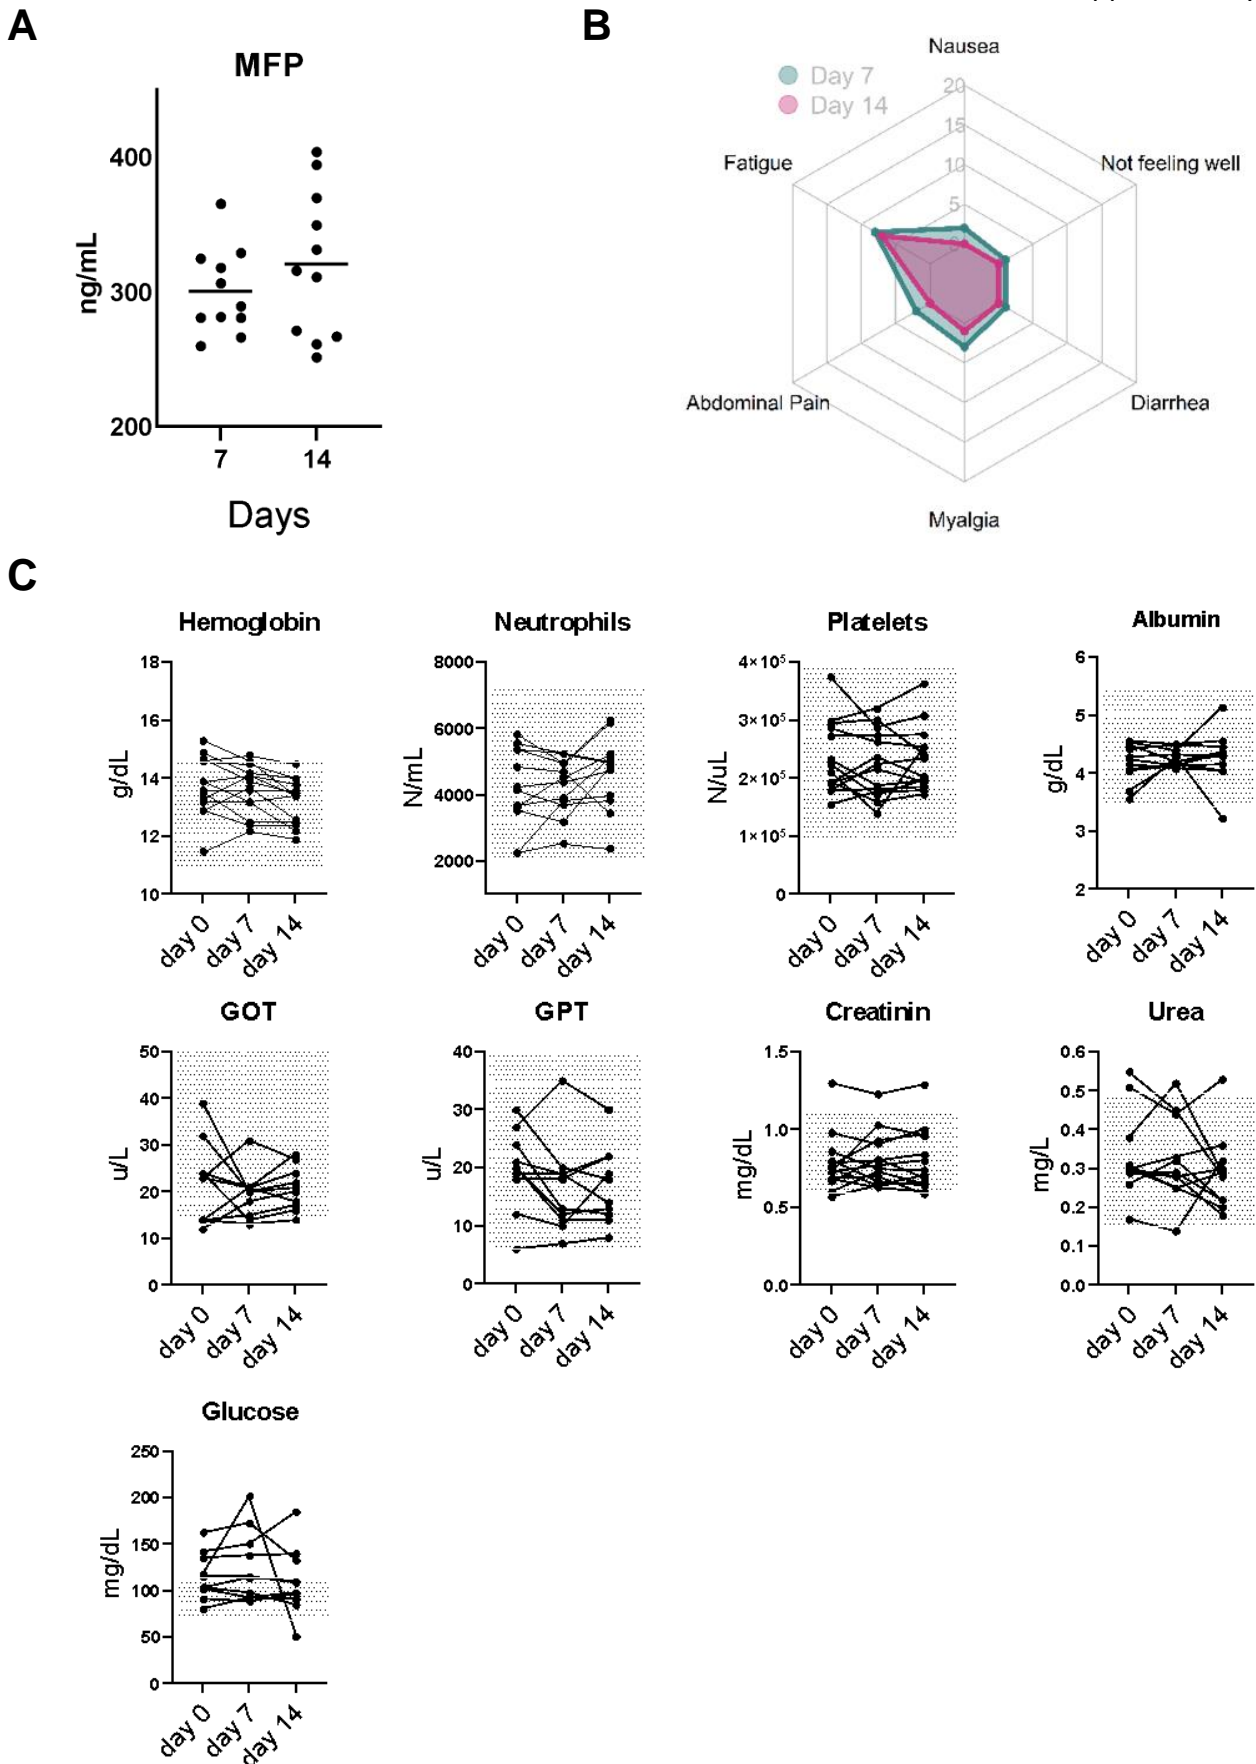

**Supplementary Figure S6.** Mifepristone plasma levels and mifepristone-related side effects. **A**, Plasma levels of mifepristone 7 or 14 days after mifepristone treatment. The data from 9-10 patients are shown. Data were analyzed with ANOVA for matched samples (Friedman test). **B**, Clinical adverse effects grade 1 recorded in mifepristone (MFP)-treated patients. **C**, Laboratory values. Patients M049, M095 and M140 were treated for diabetes. Patients M009, M019, M023, M042, M049, M062, M070, M077, M090, M095, M105 and M140 were treated for hypertension and patients M009, M019 and M124 were treated for hypothyroidism. Dotted areas represent normal levels. Patients under mifepristone treatment did not interrupt standard medicine care.
