# Supplementary material for: Beneficial Effects of Mifepristone Treatment in Patients with Breast Cancer Selected by the Progesterone Receptor Isoform Ratio: Results from the MIPRA Trial
Source: Oxford University Press journal article supplement (doi:10.1158/1078-0432.ccr-22-2060), 2022-10-21
Supplement: ccr-22-2060_supplementary_table_s3_suppts3.docx [file ccr-22-2060_supplementary_table_s3_suppts3.docx]

**Supplementary Table S3**: Morphological features of tumors before and after mifepristone treatment

|  | *Histological features* | *Type* |
| --- | --- | --- |
| *M009 CNB* | Classic ILC type with moderate amount of stroma with abundant fibrous tissue. Few apoptotic cells and absence of necrosis. Few TILs. | **ILC** |
| *M009S* | Classic ILC type with scant stroma and fibrosis. No signs of tissue remodeling. Presence of intratumor TILs next to tumor cells. No apoptotic cells. |
| *M019 CNB* | Papillary carcinoma formed by ductal cells growing on a branching framework with solid epithelial clusters and atypical sparse glands. Abundant stroma with fibrosis. Presence of TILs surrounding the tumor | **PAP** |
| *M019S* | Papillary carcinoma with partial cribriform pattern, sparse PAS+, AB+ extracellular mucin, presence of apoptotic cells and focal infarction. Abundant stroma with fibrosis similar to the CNB. Increase in TILs surrounding the tumor. |
| *M023 CNB* | Poorly differentiated carcinoma with cohesive nests, and small foci with mucinous differentiation (intra- and extracellular mucin). Moderate amount of stroma with fibrosis. Absence of TILs or necrosis and presence of few apoptotic cells. | **IC-NST** |
| *M023S* | Poorly differentiated carcinoma with small cohesive nests, with increased mucinous differentiation and vacuolated AB- and PAS- anaplastic cells. Decrease in the amount of stroma and fibrosis and increase in stromal matrix. Tumor hemorrhage and necrosis. Increase in apoptosis and TILs. Signs of tissue remodeling. |
| *M026 CNB* | Extracellular mucin with small clusters and few glands of neoplastic epithelial cells and intracellular vacuoles. Abundant stroma with fibrosis. Presence of few TILs and apoptotic cells. | **MUC** |
| *M026S* | Mucinous carcinoma. Moderate number of glands. Moderate stroma with moderate fibrosis. No signs of tissue remodeling. Presence of few TILs and apoptotic cells. |
| *M042 CNB* | Poorly differentiated carcinoma. Abundant stroma with fibrosis. Presence of TILs, and absence of apoptosis or necrosis. Cadherin-E+ tumor. | **IC-NST** |
| *M042S* | Moderately differentiated carcinoma with intra and extracellular secretion. Focal loss of cell cohesion. Abundant stroma with less fibrosis and increased stromal matrix. Increase in TILs. Absence of apoptosis or necrosis. Signs of tissue remodeling. Cadherin-E+ tumor. |
| *M044L CNB* | Poorly differentiated carcinoma with scant stroma, mild fibrosis, abundant TILs and few apoptotic cells. Cadherin-E+ tumor | **IC-NST** |
| *M044LS* | Highly differentiated carcinoma with tubular differentiation. Cells with PAS+, AB+ apical secretion. Abundant stroma with fibrosis. No signs of tissue remodeling. Absence of TILs and few apoptotic cells. Cadherin-E+ tumor. |
| *M044R CNB* | Moderately differentiated carcinoma. Moderate amount of stroma with moderate fibrosis. Few TILs and absence of apoptosis or necrosis. | **IC-NST** |
| *M044RS* | Moderately differentiated carcinoma with greater glandular/tubular differentiation and intracellular secretion. PAS+, AB+ mucins predominate in luminal cells. Moderate amount of stroma with scant fibrosis and increased extracellular matrix. Signs of tissue remodeling and increase in TILs. Absence of apoptotic cells or necrosis. |
| *M049 CNB* | Poorly differentiated carcinoma with minimal mucinous differentiation. Scant stroma and peri-tumor fibrosis. Absence of TILs, apoptotic cells or necrosis. | **IC-NST** |
| *M049S* | Highly differentiated carcinoma with extensive mucinous areas. PAS+ and AB+ mucins. Abundant stroma with increase of stromal matrix and moderate fibrosis inside and surrounding the tumor. Remarkable signs of tissue remodeling. Presence of TILs and increase in apoptosis and necrosis. |
| *M055 CNB* | Poorly differentiated carcinoma with scant fibrous stroma. Presence of TILs. Absence of apoptosis and necrosis. | **IC-NST** |
| *M055S* | Moderately differentiated carcinoma with scattered secreting cells. PAS+ and AB+ intracellular secretion. Moderate stromal tissue and fibrosis. High levels of TILs between tumor nests. Presence of apoptotic cells and of necrosis. Signs of tissue remodeling. |
| *M062 CNB* | Poorly differentiated carcinoma. Presence of signet ring cells. Scant stroma with moderate fibrosis and absence of TILs, apoptosis or necrosis. Cadherin-E+ tumor. | **IC-NST** |
| *M062S* | Moderately differentiated carcinoma. Moderate amount of stroma with less extensive fibrosis and greater stromal matrix and elastosis. Presence of TILs and absence of apoptosis or necrosis. No signs of tissue remodeling. Cadherin-E+ tumor. |
| *M070 CNB* | Lobular carcinoma, signet ring cells variant. Scant stroma and fibrosis. Almost no TILs, apoptosis or necrosis. Signs of secretory cells. | **ILC** |
| *M070S* | Classic lobular carcinoma with less signet ring cells and secretory cells than the CNB. Increased stroma, fibrosis, hyalinosis and fibroblasts. Notable signs of tissue remodeling, increase in intra- and peri-tumor TILs. Increase in apoptotic cells and necrosis. |
| *M073 CNB* | Poorly differentiated carcinoma with scant stroma and fibrosis. Few intra-tumor and moderate peri-tumor TILs, few apoptotic cells and absence of necrosis. | **IC-NST** |
| *M073S* | Poorly differentiated carcinoma with focal mucinous differentiation. PAS+ and AB+ intracellular secretion and AB+ extracellular secretion. Moderate stroma with increased stromal matrix and notable signs of tissue remodeling. Increase in intra- and peri-tumor TILs. Presence of apoptotic cells and necrosis. |
| *M077 CNB* | Classic lobular carcinoma, solid variant, scant stroma and moderate fibrosis, absence of TILs or secreting cells, apoptosis or necrosis. | **ILC** |
| *M077S* | Classic lobular carcinoma, solid variant with the presence of abundant secreting cells. Scant stroma and fibrosis with signs of tissue remodeling and elastosis. Presence of intra- and peri-tumor TILs and few apoptotic cells. |
| *M090 CNB* | Poorly differentiated carcinoma with solid sheets and large cells. Abundant stroma with abundant fibrosis. Presence of few TILs and absence of apoptosis or necrosis | **IC-NST** |
| *M090S* | Poorly differentiated carcinoma with solid nests, large cells, abundant fibrous stroma, and elastosis. Some foci showing tissue remodeling. Increase in TILs within areas with prominent stromal matrix. Presence of apoptotic cells. |
| *M094*  *CNB* | Poorly differentiated carcinoma with focal micropapillary pattern. Scant stroma and fibrosis. Absence of TILs, apoptosis or necrosis. | **IC-NST** |
| *M094S* | Poorly differentiated carcinoma with a well differentiated area and secretory cells exhibiting PAS+ vacuoles in the apical cytoplasm. Scant stroma with decrease of fibrosis and signs of tissue remodeling. Increase in TILs and apoptotic cells. |
| *M095 CNB* | Invasive lobular carcinoma, pleomorphic type, with trabecular pattern and few secretory cells. Scant stroma with fibrosis. Absence of TILs, apoptosis or necrosis. | **ILC** |
| *M095S* | Invasive lobular carcinoma, pleomorphic type with high number of mucin-producing cells. PAS+ and a few also AB+ cells. Scant stroma with moderate fibrosis and mild signs of tissue remodeling. Fibrin storage. Presence of TILs and apoptotic cells. |
| *M096 CNB* | Poorly differentiated carcinoma formed by large and solid nests and cohesive cells with scant stroma and fibrosis. Absence of TILs and presence of occasional apoptotic cells. | **IC-NST** |
| *M096S* | Poorly differentiated carcinoma with small nests, loss of cellular cohesion and intracellular edema. Moderate amount of stroma with decreased fibrosis and increased stromal matrix. TILs were observed as well as apoptotic cells. |
| *M105 CNB* | Papillary carcinoma with abundant stroma and moderate fibrosis. Absence of TILs, apoptosis or necrosis. | **PAP** |
| *M105S* | Papillary carcinoma containing a high number of clear cells and xantomized like cells (CK+, CD68). PAS- and AB- cells. Presence of hemorrhagic cysts. Scant stroma with moderate fibrosis. No signs of tissue remodeling and absence of TILs, apoptosis and necrosis. |
| *M118 CNB* | Poorly differentiated carcinoma with solid pattern. Abundant stroma and abundant fibrosis. Absence of TILs, apoptotic cells or necrosis. | **IC-NST** |
| *M118S* | Moderately differentiated carcinoma including secretory cells with PAS+, AB- cytoplasm. Abundant stroma with thin fibrous bands. Presence of TILs and apoptosis cells. No signs of tissue remodeling. |
| *M124 CNB* | Poorly differentiated carcinoma. Moderate amount of stroma and fibrosis. Absence of TILs, apoptotic cells or necrosis. | **IC-NST** |
| *M124S* | Poorly differentiated carcinoma with PAS+ and AB+ intracellular secretion. Abundant stroma and fibrosis. Presence of apoptotic cells and absence of TILs. |
| *M140 CNB* | Moderately differentiated carcinoma with scant stroma and fibrosis. Absence of TILs, few apoptotic cells and absence of necrosis. | **IC-NST** |
| *M140 S* | Moderately differentiated carcinoma with PAS-, AB- secretory-like cells. Moderate amount of stroma, fibrosis and signs of tissue remodeling. Presence of TILs, and apoptotic cells. |

*Abbreviations. CNB: Core needle biopsy; S: surgical sample; ILC: Invasive lobular carcinoma; IC-NST: Invasive carcinoma of no special type; MUC: Mucinous carcinoma; PAP: Papillary carcinoma; TILs: Tumor infiltrating lymphocytes; PAS: Periodic acid Schiff staining; AB: Alcian blue staining: CK: cytokeratin*
