# Supplementary material for: Beneficial Effects of Mifepristone Treatment in Patients with Breast Cancer Selected by the Progesterone Receptor Isoform Ratio: Results from the MIPRA Trial
Source: Oxford University Press journal article supplement (doi:10.1158/1078-0432.ccr-22-2060), 2022-10-21
Supplement: ccr-22-2060_supplementary_table_s6_suppts6.xlsx [file ccr-22-2060_supplementary_table_s6_suppts6.xlsx]

## Sheet: Mapping_UP
#queryIndex	queryItem	stringId	preferredName	annotation
1	GRPEL1	9606.ENSP00000264954	GRPEL1	GrpE protein homolog 1, mitochondrial; Essential component of the PAM complex, a complex required for the translocation of transit peptide-containing proteins from the inner membrane into the mitochondrial matrix in an ATP-dependent manner (By similarity). Seems to control the nucleotide-dependent binding of mitochondrial HSP70 to substrate proteins
2	LUC7L2	9606.ENSP00000440222	LUC7L2	LUC7 like 2, pre-mRNA splicing factor; Putative RNA-binding protein Luc7-like 2; May bind to RNA via its Arg/Ser-rich domain
3	EIF3J	9606.ENSP00000261868	EIF3J	Eukaryotic translation initiation factor 3 subunit J; Component of the eukaryotic translation initiation factor 3 (eIF-3) complex, which is required for several steps in the initiation of protein synthesis. The eIF-3 complex associates with the 40S ribosome and facilitates the recruitment of eIF-1, eIF-1A, eIF- 2:GTP:methionyl-tRNAi and eIF-5 to form the 43S pre-initiation complex (43S PIC). The …
4	GOLGA4	9606.ENSP00000349305	GOLGA4	Golgin subfamily A member 4; May play a role in delivery of transport vesicles containing GPI-linked proteins from the trans-Golgi network through its interaction with MACF1
5	SGPL1	9606.ENSP00000362298	SGPL1	Sphinganine-1-phosphate aldolase; Sphingosine-1-phosphate lyase 1; Cleaves phosphorylated sphingoid bases (PSBs), such as sphingosine-1-phosphate, into fatty aldehydes and phosphoethanolamine. Elevates stress-induced ceramide production and apoptosis; Belongs to the group II decarboxylase family. Sphingosine-1-phosphate lyase subfamily
6	ADD1	9606.ENSP00000264758	ADD1	Alpha-adducin; Membrane-cytoskeleton-associated protein that promotes the assembly of the spectrin-actin network. Binds to calmodulin
7	NUP155	9606.ENSP00000231498	NUP155	Nuclear pore complex protein Nup155; Essential component of nuclear pore complex. Could be essessential for embryogenesis. Nucleoporins may be involved both in binding and translocating proteins during nucleocytoplasmic transport
8	DPEP1	9606.ENSP00000376807	DPEP1	Dipeptidase 1; Hydrolyzes a wide range of dipeptides. Implicated in the renal metabolism of glutathione and its conjugates. Converts leukotriene D4 to leukotriene E4; it may play an important role in the regulation of leukotriene activity
9	EPPK1	9606.ENSP00000484472	EPPK1	Epiplakin; Cytoskeletal linker protein that connects to intermediate filaments and controls their reorganization in response to stress. In response to mechanical stress like wound healing, is associated with the machinery for cellular motility by slowing down keratinocyte migration and proliferation and accelerating keratin bundling in proliferating keratinocytes thus contributing to tissue archi…
10	ALDH3A2	9606.ENSP00000345774	ALDH3A2	Aldehyde dehydrogenase 3 family member a2; Fatty aldehyde dehydrogenase; Catalyzes the oxidation of long-chain aliphatic aldehydes to fatty acids. Active on a variety of saturated and unsaturated aliphatic aldehydes between 6 and 24 carbons in length. Responsible for conversion of the sphingosine 1-phosphate (S1P) degradation product hexadecenal to hexadecenoic acid
11	C14orf166	9606.ENSP00000261700	C14orf166	RNA transcription, translation and transport factor protein; RNA-binding protein involved in modulation of mRNA transcription by Polymerase II. Component of the tRNA-splicing ligase complex and is required for tRNA ligation. May be required for RNA transport
12	NDUFB10	9606.ENSP00000268668	NDUFB10	NADH dehydrogenase [ubiquinone] 1 beta subcomplex subunit 10; Accessory subunit of the mitochondrial membrane respiratory chain NADH dehydrogenase (Complex I), that is believed not to be involved in catalysis. Complex I functions in the transfer of electrons from NADH to the respiratory chain. The immediate electron acceptor for the enzyme is believed to be ubiquinone; NADH:ubiquinone oxidoreduct…
13	BIN1	9606.ENSP00000316779	BIN1	Myc box-dependent-interacting protein 1; May be involved in regulation of synaptic vesicle endocytosis. May act as a tumor suppressor and inhibits malignant cell transformation; N-BAR domain containing
14	PHKB	9606.ENSP00000313504	PHKB	Phosphorylase b kinase regulatory subunit beta; Phosphorylase b kinase catalyzes the phosphorylation of serine in certain substrates, including troponin I. The beta chain acts as a regulatory unit and modulates the activity of the holoenzyme in response to phosphorylation
15	SLC25A4	9606.ENSP00000281456	SLC25A4	Solute carrier family 25 (mitochondrial adenine nucleotide translocator), member 4/5/6/31; ADP/ATP translocase 1; Involved in mitochondrial ADP/ATP transport. Catalyzes the exchange of cytoplasmic ADP with mitochondrial ATP across the mitochondrial inner membrane; Belongs to the mitochondrial carrier (TC 2.A.29) family
16	FTH1	9606.ENSP00000273550	FTH1	Ferritin heavy chain; Stores iron in a soluble, non-toxic, readily available form. Important for iron homeostasis. Has ferroxidase activity. Iron is taken up in the ferrous form and deposited as ferric hydroxides after oxidation. Also plays a role in delivery of iron to cells. Mediates iron uptake in capsule cells of the developing kidney (By similarity); Belongs to the ferritin family
17	VIM	9606.ENSP00000446007	VIM	Vimentin; Vimentins are class-III intermediate filaments found in various non-epithelial cells, especially mesenchymal cells. Vimentin is attached to the nucleus, endoplasmic reticulum, and mitochondria, either laterally or terminally
18	PPP1CC	9606.ENSP00000341779	PPP1CC	Serine/threonine-protein phosphatase PP1-gamma catalytic subunit; Protein phosphatase that associates with over 200 regulatory proteins to form highly specific holoenzymes which dephosphorylate hundreds of biological targets. Protein phosphatase 1 (PP1) is essential for cell division, and participates in the regulation of glycogen metabolism, muscle contractility and protein synthesis. Dephosphor…
19	PFDN6	9606.ENSP00000378563	PFDN6	Prefoldin subunit 6; Binds specifically to cytosolic chaperonin (c-CPN) and transfers target proteins to it. Binds to nascent polypeptide chain and promotes folding in an environment in which there are many competing pathways for nonnative proteins; Prefoldin subunits
20	SEC61G	9606.ENSP00000388337	SEC61G	Protein transport protein Sec61 subunit gamma; Necessary for protein translocation in the endoplasmic reticulum; Belongs to the SecE/SEC61-gamma family
21	CLYBL	9606.ENSP00000365533	CLYBL	Citramalyl-CoA lyase, mitochondrial; Mitochondrial citramalyl-CoA lyase indirectly involved in the vitamin B12 metabolism. Converts citramalyl-CoA into acetyl-CoA and pyruvate in the C5- dicarboxylate catabolism pathway. The C5- dicarboxylate catabolism pathway is required to detoxify itaconate, a vitamin B12-poisoning metabolite. Also acts as a malate synthase in vitro, converting glyoxylate and…
22	TUBB1	9606.ENSP00000217133	TUBB1	Tubulin beta-1 chain; Tubulin is the major constituent of microtubules. It binds two moles of GTP, one at an exchangeable site on the beta chain and one at a non-exchangeable site on the alpha chain (By similarity); Belongs to the tubulin family
23	ACSS2	9606.ENSP00000253382	ACSS2	Acetyl-coenzyme A synthetase, cytoplasmic; Activates acetate so that it can be used for lipid synthesis or for energy generation; Acyl-CoA synthetase family
24	ARHGAP4	9606.ENSP00000359045	ARHGAP4	Rho GTPase-activating protein 4; Inhibitory effect on stress fiber organization. May down-regulate Rho-like GTPase in hematopoietic cells; F-BAR domain containing
25	FLNB	9606.ENSP00000420213	FLNB	Filamin-B; Connects cell membrane constituents to the actin cytoskeleton. May promote orthogonal branching of actin filaments and links actin filaments to membrane glycoproteins. Anchors various transmembrane proteins to the actin cytoskeleton. Interaction with FLNA may allow neuroblast migration from the ventricular zone into the cortical plate. Various interactions and localizations of isoforms…
26	HIST2H2BE	9606.ENSP00000358151	HIST2H2BE	Histone cluster 2 h2b family member e; Histone H2B type 2-E; Core component of nucleosome. Nucleosomes wrap and compact DNA into chromatin, limiting DNA accessibility to the cellular machineries which require DNA as a template. Histones thereby play a central role in transcription regulation, DNA repair, DNA replication and chromosomal stability. DNA accessibility is regulated via a complex set o…
27	CLTB	9606.ENSP00000309415	CLTB	Clathrin light chain B; Clathrin is the major protein of the polyhedral coat of coated pits and vesicles; Belongs to the clathrin light chain family
28	DNAJC2	9606.ENSP00000368565	DNAJC2	DnaJ homolog subfamily C member 2; Acts both as a chaperone in the cytosol and as a chromatin regulator in the nucleus. When cytosolic, acts as a molecular chaperone: component of the ribosome-associated complex (RAC), a complex involved in folding or maintaining nascent polypeptides in a folding-competent state. In the RAC complex, stimulates the ATPase activity of the ribosome-associated pool o…
29	NDUFAF2	9606.ENSP00000296597	NDUFAF2	NADH dehydrogenase [ubiquinone] 1 alpha subcomplex assembly factor 2; Acts as a molecular chaperone for mitochondrial complex I assembly. Complex I functions in the transfer of electrons from NADH to the respiratory chain. The immediate electron acceptor for the enzyme is believed to be ubiquinone
30	GSTM1	9606.ENSP00000311469	GSTM1	Glutathione S-transferase Mu 1; Conjugation of reduced glutathione to a wide number of exogenous and endogenous hydrophobic electrophiles; Soluble glutathione S-transferases
31	ARFIP1	9606.ENSP00000395083	ARFIP1	Arfaptin-1; Putative target protein of ADP-ribosylation factor; Classical BAR domain containing
32	HTATSF1	9606.ENSP00000442699	HTATSF1	HIV Tat-specific factor 1; Functions as a general transcription factor playing a role in the process of transcriptional elongation. May mediate the reciprocal stimulatory effect of splicing on transcriptional elongation. In case of infection by HIV-1, it is up-regulated by the HIV-1 proteins NEF and gp120, acts as a cofactor required for the Tat-enhanced transcription of the virus; RNA binding mo…
33	HLA-DQB1	9606.ENSP00000364080	HLA-DQB1	Major histocompatibility complex, class ii, dq beta 1; HLA class II histocompatibility antigen, DQ beta 1 chain; Binds peptides derived from antigens that access the endocytic route of antigen presenting cells (APC) and presents them on the cell surface for recognition by the CD4 T-cells. The peptide binding cleft accommodates peptides of 10-30 residues. The peptides presented by MHC class II mol…
34	CLEC3A	9606.ENSP00000299642	CLEC3A	C-type lectin domain family 3 member A; Promotes cell adhesion to laminin-332 and fibronectin; C-type lectin domain containing
35	FAM21A	9606.ENSP00000282633	FAM21A	WASH complex subunit 2A; Acts at least in part as component of the WASH core complex whose assembly at the surface of endosomes inhibits WASH nucleation-promoting factor (NPF) activity in recruiting and activating the Arp2/3 complex to induce actin polymerization and is involved in the fission of tubules that serve as transport intermediates during endosome sorting. Mediates the recruitment of th…
36	NEK7	9606.ENSP00000356355	NEK7	Nima (never in mitosis gene a)-related kinase 7; Serine/threonine-protein kinase Nek7; Protein kinase which plays an important role in mitotic cell cycle progression. Required for microtubule nucleation activity of the centrosome, robust mitotic spindle formation and cytokinesis. Phosphorylates RPS6KB1
37	RPL36AL	9606.ENSP00000346012	RPL36AL	Large subunit ribosomal protein l44e; Belongs to the eukaryotic ribosomal protein eL42 family
38	IMMT	9606.ENSP00000387262	IMMT	MICOS complex subunit MIC60; Component of the MICOS complex, a large protein complex of the mitochondrial inner membrane that plays crucial roles in the maintenance of crista junctions, inner membrane architecture, and formation of contact sites to the outer membrane. Plays an important role in the maintenance of the MICOS complex stability and the mitochondrial cristae morphology
39	ITGB2	9606.ENSP00000380948	ITGB2	Integrin beta-2; Integrin ITGAL/ITGB2 is a receptor for ICAM1, ICAM2, ICAM3 and ICAM4. Integrins ITGAM/ITGB2 and ITGAX/ITGB2 are receptors for the iC3b fragment of the third complement component and for fibrinogen. Integrin ITGAX/ITGB2 recognizes the sequence G-P-R in fibrinogen alpha-chain. Integrin ITGAM/ITGB2 recognizes P1 and P2 peptides of fibrinogen gamma chain. Integrin ITGAM/ITGB2 is also…
40	PLIN2	9606.ENSP00000276914	PLIN2	Perilipin-2; May be involved in development and maintenance of adipose tissue; Perilipins
41	STK10	9606.ENSP00000176763	STK10	Serine/threonine-protein kinase 10; Serine/threonine-protein kinase involved in regulation of lymphocyte migration. Phosphorylates MSN, and possibly PLK1. Involved in regulation of lymphocyte migration by mediating phosphorylation of ERM proteins such as MSN. Acts as a negative regulator of MAP3K1/MEKK1. May also act as a cell cycle regulator by acting as a polo kinase kinase: mediates phosphoryl…
42	GPX4	9606.ENSP00000346103	GPX4	Phospholipid hydroperoxide glutathione peroxidase, mitochondrial; Protects cells against membrane lipid peroxidation and cell death. Required for normal sperm development and male fertility. Could play a major role in protecting mammals from the toxicity of ingested lipid hydroperoxides. Essential for embryonic development. Protects from radiation and oxidative damage. Essential for maturation an…
43	LSP1	9606.ENSP00000371194	LSP1	Lymphocyte-specific protein 1; May play a role in mediating neutrophil activation and chemotaxis
44	CAMK2D	9606.ENSP00000339740	CAMK2D	Calcium/calmodulin-dependent protein kinase type II subunit delta; Calcium/calmodulin-dependent protein kinase involved in the regulation of Ca(2+) homeostatis and excitation-contraction coupling (ECC) in heart by targeting ion channels, transporters and accessory proteins involved in Ca(2+) influx into the myocyte, Ca(2+) release from the sarcoplasmic reticulum (SR), SR Ca(2+) uptake and Na(+) a…
45	AGK	9606.ENSP00000347581	AGK	Acylglycerol kinase, mitochondrial; Lipid kinase that can phosphorylate both monoacylglycerol and diacylglycerol to form lysophosphatidic acid (LPA) and phosphatidic acid (PA), respectively. Does not phosphorylate sphingosine. Independently of its lipid kinase activity, acts as a component of the TIM22 complex. The TIM22 complex mediates the import and insertion of multi-pass transmembrane protei…
46	CALML3	9606.ENSP00000315299	CALML3	Calmodulin-like protein 3; May function as a specific light chain of unconventional myosin-10 (MYO10), also enhances MYO10 translation, possibly by acting as a chaperone for the emerging MYO10 heavy chain protein. May compete with calmodulin by binding, with different affinities, to cellular substrates
47	C8orf82	9606.ENSP00000436621	C8orf82	UPF0598 protein C8orf82; Chromosome 8 open reading frame 82
48	AFG3L2	9606.ENSP00000269143	AFG3L2	AFG3-like protein 2; ATP-dependent protease which is essential for axonal and neuron development. In neurons, mediates degradation of SMDT1/EMRE before its assembly with the uniporter complex, limiting the availability of SMDT1/EMRE for MCU assembly and promoting efficient assembly of gatekeeper subunits with MCU. Required for the maturation of paraplegin (SPG7) after its cleavage by mitochondria…
49	RANBP2	9606.ENSP00000283195	RANBP2	E3 SUMO-protein ligase RanBP2; E3 SUMO-protein ligase which facilitates SUMO1 and SUMO2 conjugation by UBE2I. Involved in transport factor (Ran-GTP, karyopherin)-mediated protein import via the F-G repeat-containing domain which acts as a docking site for substrates. Binds single- stranded RNA (in vitro). May bind DNA. Component of the nuclear export pathway. Specific docking site for the nuclear…
50	FCGRT	9606.ENSP00000221466	FCGRT	Fc fragment of igg receptor and transporter; IgG receptor FcRn large subunit p51; Binds to the Fc region of monomeric immunoglobulins gamma. Mediates the selective uptake of IgG from milk and helps newborn animals to acquire passive immunity. IgG in the milk is bound at the apical surface of the intestinal epithelium. The resultant FcRn-IgG complexes are transcytosed across the intestinal epithel…
51	LRP2	9606.ENSP00000263816	LRP2	Low-density lipoprotein receptor-related protein 2; Multiligand endocytic receptor (By similarity). Acts together with CUBN to mediate endocytosis of high-density lipoproteins (By similarity). Mediates receptor-mediated uptake of polybasic drugs such as aprotinin, aminoglycosides and polymyxin B (By similarity). In the kidney, mediates the tubular uptake and clearance of leptin (By similarity). A…
52	PTPLAD1	9606.ENSP00000261875	PTPLAD1	Very-long-chain (3R)-3-hydroxyacyl-CoA dehydratase 3; Catalyzes the third of the four reactions of the long- chain fatty acids elongation cycle. This endoplasmic reticulum- bound enzymatic process, allows the addition of two carbons to the chain of long- and very long-chain fatty acids/VLCFAs per cycle. This enzyme catalyzes the dehydration of the 3-hydroxyacyl-CoA intermediate into trans-2,3-eno…
53	ACADM	9606.ENSP00000359871	ACADM	Medium-chain specific acyl-CoA dehydrogenase, mitochondrial; Acyl-CoA dehydrogenase specific for acyl chain lengths of 4 to 16 that catalyzes the initial step of fatty acid beta- oxidation. Utilizes the electron transfer flavoprotein (ETF) as an electron acceptor to transfer electrons to the main mitochondrial respiratory chain via ETF-ubiquinone oxidoreductase (ETF dehydrogenase)
54	MRPL11	9606.ENSP00000308897	MRPL11	39S ribosomal protein L11, mitochondrial; Mitochondrial ribosomal protein L11; Belongs to the universal ribosomal protein uL11 family
55	SLC9A3R1	9606.ENSP00000262613	SLC9A3R1	Na(+)/H(+) exchange regulatory cofactor NHE-RF1; Scaffold protein that connects plasma membrane proteins with members of the ezrin/moesin/radixin family and thereby helps to link them to the actin cytoskeleton and to regulate their surface expression. Necessary for recycling of internalized ADRB2. Was first known to play a role in the regulation of the activity and subcellular location of SLC9A3.…
56	ARMCX3	9606.ENSP00000340672	ARMCX3	Armadillo repeat-containing X-linked protein 3; Regulates mitochondrial aggregation and transport in axons in living neurons. May link mitochondria to the TRAK2- kinesin motor complex via its interaction with Miro and TRAK2. Mitochondrial distribution and dynamics is regulated through ARMCX3 protein degradation, which is promoted by PCK and negatively regulated by WNT1. Enhances the SOX10-mediate…
57	MRPS35	9606.ENSP00000081029	MRPS35	28S ribosomal protein S35, mitochondrial; Mitochondrial ribosomal protein S35
58	SLC27A2	9606.ENSP00000267842	SLC27A2	Very long-chain acyl-CoA synthetase; Acyl-CoA synthetase probably involved in bile acid metabolism. Proposed to activate C27 precursors of bile acids to their CoA thioesters derivatives before side chain cleavage via peroxisomal beta-oxidation occurs. In vitro, activates 3-alpha,7- alpha,12-alpha-trihydroxy-5-beta-cholestanate (THCA), the C27 precursor of cholic acid deriving from the de novo syn…
59	GLUD1	9606.ENSP00000277865	GLUD1	Glutamate dehydrogenase 1, mitochondrial; Mitochondrial glutamate dehydrogenase that converts L- glutamate into alpha-ketoglutarate. Plays a key role in glutamine anaplerosis by producing alpha-ketoglutarate, an important intermediate in the tricarboxylic acid cycle. May be involved in learning and memory reactions by increasing the turnover of the excitatory neurotransmitter glutamate (By simila…
60	ARGLU1	9606.ENSP00000383059	ARGLU1	Arginine and glutamate-rich protein 1; Required for the estrogen-dependent expression of ESR1 target genes. Can act in cooperation with MED1
61	DNAJA2	9606.ENSP00000314030	DNAJA2	DnaJ homolog subfamily A member 2; Co-chaperone of Hsc70. Stimulates ATP hydrolysis and the folding of unfolded proteins mediated by HSPA1A/B (in vitro); DNAJ heat shock proteins
62	PCDH1	9606.ENSP00000287008	PCDH1	Protocadherin-1; May be involved in cell-cell interaction processes and in cell adhesion; Non-clustered protocadherins
63	AAK1	9606.ENSP00000386456	AAK1	AP2-associated protein kinase 1; Regulates clathrin-mediated endocytosis by phosphorylating the AP2M1/mu2 subunit of the adaptor protein complex 2 (AP-2) which ensures high affinity binding of AP-2 to cargo membrane proteins during the initial stages of endocytosis. Isoform 1 and isoform 2 display similar levels of kinase activity towards AP2M1. Regulates phosphorylation of other AP-2 subunits as…
64	SLC1A4	9606.ENSP00000234256	SLC1A4	Neutral amino acid transporter A; Transporter for alanine, serine, cysteine, and threonine. Exhibits sodium dependence; Solute carriers
65	LANCL2	9606.ENSP00000254770	LANCL2	LanC-like protein 2; Necessary for abscisic acid (ABA) binding on the cell membrane and activation of the ABA signaling pathway in granulocytes
66	HLA-DPB1	9606.ENSP00000408146	HLA-DPB1	HLA class II histocompatibility antigen, DP beta 1 chain; Binds peptides derived from antigens that access the endocytic route of antigen presenting cells (APC) and presents them on the cell surface for recognition by the CD4 T-cells. The peptide binding cleft accommodates peptides of 10-30 residues. The peptides presented by MHC class II molecules are generated mostly by degradation of proteins …
67	KDM1A	9606.ENSP00000383042	KDM1A	[histone h3]-n6,n6-dimethyl-l-lysine4 fad-dependent demethylase; Lysine-specific histone demethylase 1A; Histone demethylase that demethylates both 'Lys-4' (H3K4me) and 'Lys-9' (H3K9me) of histone H3, thereby acting as a coactivator or a corepressor, depending on the context. Acts by oxidizing the substrate by FAD to generate the corresponding imine that is subsequently hydrolyzed. Acts as a core…
68	CLTA	9606.ENSP00000242285	CLTA	Clathrin light chain A; Clathrin is the major protein of the polyhedral coat of coated pits and vesicles. Acts as component of the TACC3/ch- TOG/clathrin complex proposed to contribute to stabilization of kinetochore fibers of the mitotic spindle by acting as inter- microtubule bridge
69	RPS29	9606.ENSP00000379339	RPS29	Small subunit ribosomal protein s29e; Ribosomal protein S29
70	SAP130	9606.ENSP00000350333	SAP130	Histone deacetylase complex subunit SAP130; Acts as a transcriptional repressor. May function in the assembly and/or enzymatic activity of the mSin3A corepressor complex or in mediating interactions between the complex and other regulatory complexes
71	MAPT	9606.ENSP00000340820	MAPT	Microtubule-associated protein tau; Promotes microtubule assembly and stability, and might be involved in the establishment and maintenance of neuronal polarity. The C-terminus binds axonal microtubules while the N- terminus binds neural plasma membrane components, suggesting that tau functions as a linker protein between both. Axonal polarity is predetermined by TAU/MAPT localization (in the neu…
72	BCKDHB	9606.ENSP00000318351	BCKDHB	2-oxoisovalerate dehydrogenase subunit beta, mitochondrial; The branched-chain alpha-keto dehydrogenase complex catalyzes the overall conversion of alpha-keto acids to acyl-CoA and CO(2). It contains multiple copies of three enzymatic components: branched-chain alpha-keto acid decarboxylase (E1), lipoamide acyltransferase (E2) and lipoamide dehydrogenase (E3)
73	THEM6	9606.ENSP00000338607	THEM6	Protein THEM6; Thioesterase superfamily member 6
74	HMOX1	9606.ENSP00000216117	HMOX1	Heme oxygenase 1; Heme oxygenase cleaves the heme ring at the alpha methene bridge to form biliverdin. Biliverdin is subsequently converted to bilirubin by biliverdin reductase. Under physiological conditions, the activity of heme oxygenase is highest in the spleen, where senescent erythrocytes are sequestrated and destroyed. Exhibits cytoprotective effects since excess of free heme sensitizes ce…
75	HSPA1A	9606.ENSP00000364802	HSPA1A	Heat shock protein family a member 1a; Heat shock 70 kDa protein 1A; Molecular chaperone implicated in a wide variety of cellular processes, including protection of the proteome from stress, folding and transport of newly synthesized polypeptides, activation of proteolysis of misfolded proteins and the formation and dissociation of protein complexes. Plays a pivotal role in the protein quality co…
76	GNPAT	9606.ENSP00000355607	GNPAT	Dihydroxyacetone phosphate acyltransferase; Glyceronephosphate O-acyltransferase
77	RBM28	9606.ENSP00000223073	RBM28	RNA-binding protein 28; Nucleolar component of the spliceosomal ribonucleoprotein complexes; RNA binding motif containing
78	PDCD5	9606.ENSP00000466214	PDCD5	Programmed cell death protein 5; May function in the process of apoptosis
79	EPHX2	9606.ENSP00000430269	EPHX2	Bifunctional epoxide hydrolase 2; Bifunctional enzyme. The C-terminal domain has epoxide hydrolase activity and acts on epoxides (alkene oxides, oxiranes) and arene oxides. Plays a role in xenobiotic metabolism by degrading potentially toxic epoxides (By similarity). Also determines steady-state levels of physiological mediators. The N-terminal domain has lipid phosphatase activity, with the high…
80	SMAP1	9606.ENSP00000359484	SMAP1	Stromal membrane-associated protein 1; GTPase activating protein that acts on ARF6. Plays a role in clathrin-dependent endocytosis. May play a role in erythropoiesis (By similarity); ArfGAPs

## Sheet: RTCM_UP
#term ID	term description	observed gene count	background gene count	strength	false discovery rate	matching proteins in your network (IDs)	matching proteins in your network (labels)
HSA-1430728	Metabolism	25	2089	0.47	0.0009	9606.ENSP00000216117,9606.ENSP00000231498,9606.ENSP00000253382,9606.ENSP00000261875,9606.ENSP00000263816,9606.ENSP00000267842,9606.ENSP00000268668,9606.ENSP00000276914,9606.ENSP00000277865,9606.ENSP00000283195,9606.ENSP00000296597,9606.ENSP00000311469,9606.ENSP00000313504,9606.ENSP00000318351,9606.ENSP00000341779,9606.ENSP00000345774,9606.ENSP00000346012,9606.ENSP00000346103,9606.ENSP00000347581,…	HMOX1,NUP155,ACSS2,PTPLAD1,LRP2,SLC27A2,NDUFB10,PLIN2,GLUD1,RANBP2,NDUFAF2,GSTM1,PHKB,BCKDHB,PPP1CC,ALDH3A2,RPL36AL,GPX4,AGK,GNPAT,ACADM,SGPL1,DPEP1,RPS29,EPHX2
HSA-9609507	Protein localization	8	160	1.09	0.0009	9606.ENSP00000216117,9606.ENSP00000264954,9606.ENSP00000267842,9606.ENSP00000281456,9606.ENSP00000345774,9606.ENSP00000355607,9606.ENSP00000388337,9606.ENSP00000430269	HMOX1,GRPEL1,SLC27A2,SLC25A4,ALDH3A2,GNPAT,SEC61G,EPHX2
HSA-556833	Metabolism of lipids	13	733	0.64	0.0067	9606.ENSP00000261875,9606.ENSP00000263816,9606.ENSP00000267842,9606.ENSP00000276914,9606.ENSP00000341779,9606.ENSP00000345774,9606.ENSP00000346103,9606.ENSP00000347581,9606.ENSP00000355607,9606.ENSP00000359871,9606.ENSP00000362298,9606.ENSP00000376807,9606.ENSP00000430269	PTPLAD1,LRP2,SLC27A2,PLIN2,PPP1CC,ALDH3A2,GPX4,AGK,GNPAT,ACADM,SGPL1,DPEP1,EPHX2
HSA-8978868	Fatty acid metabolism	7	175	0.99	0.0067	9606.ENSP00000261875,9606.ENSP00000267842,9606.ENSP00000345774,9606.ENSP00000346103,9606.ENSP00000359871,9606.ENSP00000376807,9606.ENSP00000430269	PTPLAD1,SLC27A2,ALDH3A2,GPX4,ACADM,DPEP1,EPHX2
HSA-264870	Caspase-mediated cleavage of cytoskeletal proteins	3	12	1.79	0.0124	9606.ENSP00000264758,9606.ENSP00000340820,9606.ENSP00000446007	ADD1,MAPT,VIM
HSA-9609523	Insertion of tail-anchored proteins into the endoplasmic reticulum membrane	3	21	1.54	0.0448	9606.ENSP00000216117,9606.ENSP00000345774,9606.ENSP00000388337	HMOX1,ALDH3A2,SEC61G

## Sheet: Mapping_DOWN
Supplementary Table S6. Proteomics: DE and Reactome Cyt proteins
#queryIndex	queryItem	stringId	preferredName	annotation
1	ERLIN1	9606.ENSP00000410964	ERLIN1	Erlin-1; Component of the ERLIN1/ERLIN2 complex which mediates the endoplasmic reticulum-associated degradation (ERAD) of inositol 1,4,5-trisphosphate receptors (IP3Rs). Involved in regulation of cellular cholesterol homeostasis by regulation the SREBP signaling pathway. Binds cholesterol and may promote ER retention of the SCAP-SREBF complex; Belongs to the band 7/mec-2 family
2	IFI35	9606.ENSP00000395590	IFI35	Interferon-induced 35 kDa protein; Not yet known
3	TLN2	9606.ENSP00000453508	TLN2	Talin-2; As a major component of focal adhesion plaques that links integrin to the actin cytoskeleton, may play an important role in cell adhesion. Recruits PIP5K1C to focal adhesion plaques and strongly activates its kinase activity (By similarity); FERM domain containing
4	GNG12	9606.ENSP00000360021	GNG12	Guanine nucleotide-binding protein G(I)/G(S)/G(O) subunit gamma-12; Guanine nucleotide-binding proteins (G proteins) are involved as a modulator or transducer in various transmembrane signaling systems. The beta and gamma chains are required for the GTPase activity, for replacement of GDP by GTP, and for G protein- effector interaction
5	ISLR	9606.ENSP00000249842	ISLR	Immunoglobulin superfamily containing leucine-rich repeat protein; Immunoglobulin superfamily containing leucine rich repeat; I-set domain containing
6	CNN1	9606.ENSP00000252456	CNN1	Calponin-1; Thin filament-associated protein that is implicated in the regulation and modulation of smooth muscle contraction. It is capable of binding to actin, calmodulin, troponin C and tropomyosin. The interaction of calponin with actin inhibits the actomyosin Mg-ATPase activity (By similarity)
7	NDUFAB1	9606.ENSP00000458770	NDUFAB1	Acyl carrier protein, mitochondrial; Carrier of the growing fatty acid chain in fatty acid biosynthesis (By similarity). Accessory and non-catalytic subunit of the mitochondrial membrane respiratory chain NADH dehydrogenase (Complex I), which functions in the transfer of electrons from NADH to the respiratory chain; Belongs to the acyl carrier protein (ACP) family
8	ECM1	9606.ENSP00000358045	ECM1	Extracellular matrix protein 1; Involved in endochondral bone formation as negative regulator of bone mineralization. Stimulates the proliferation of endothelial cells and promotes angiogenesis. Inhibits MMP9 proteolytic activity
9	APCS	9606.ENSP00000255040	APCS	Serum amyloid P-component; Can interact with DNA and histones and may scavenge nuclear material released from damaged circulating cells. May also function as a calcium-dependent lectin; Belongs to the pentraxin family
10	EEF1A2	9606.ENSP00000217182	EEF1A2	Elongation factor 1-alpha 2; This protein promotes the GTP-dependent binding of aminoacyl-tRNA to the A-site of ribosomes during protein biosynthesis; Belongs to the TRAFAC class translation factor GTPase superfamily. Classic translation factor GTPase family. EF-Tu/EF-1A subfamily
11	ZNF185	9606.ENSP00000440847	ZNF185	Zinc finger protein 185; May be involved in the regulation of cellular proliferation and/or differentiation; LIM domain containing
12	TIMP1	9606.ENSP00000218388	TIMP1	Metalloproteinase inhibitor 1; Metalloproteinase inhibitor that functions by forming one to one complexes with target metalloproteinases, such as collagenases, and irreversibly inactivates them by binding to their catalytic zinc cofactor. Acts on MMP1, MMP2, MMP3, MMP7, MMP8, MMP9, MMP10, MMP11, MMP12, MMP13 and MMP16. Does not act on MMP14. Also functions as a growth factor that regulates cell d…
13	LRP1	9606.ENSP00000243077	LRP1	Prolow-density lipoprotein receptor-related protein 1; Endocytic receptor involved in endocytosis and in phagocytosis of apoptotic cells. Required for early embryonic development. Involved in cellular lipid homeostasis. Involved in the plasma clearance of chylomicron remnants and activated LRPAP1 (alpha 2-macroglobulin), as well as the local metabolism of complexes between plasminogen activators …
14	NRBP1	9606.ENSP00000233557	NRBP1	Nuclear receptor-binding protein; May play a role in subcellular trafficking between the endoplasmic reticulum and Golgi apparatus through interactions with the Rho-type GTPases. Binding to the NS3 protein of dengue virus type 2 appears to subvert this activity into the alteration of the intracellular membrane structure associated with flaviviral replication; Belongs to the protein kinase superfa…
15	RASA1	9606.ENSP00000274376	RASA1	Ras GTPase-activating protein 1; Inhibitory regulator of the Ras-cyclic AMP pathway. Stimulates the GTPase of normal but not oncogenic Ras p21; this stimulation may be further increased in the presence of NCK1; C2 and RasGAP domain containing
16	FBN1	9606.ENSP00000325527	FBN1	Fibrillin-1; Fibrillin-1: Structural component of the 10-12 nm diameter microfibrils of the extracellular matrix, which conveys both structural and regulatory properties to load-bearing connective tissues. Fibrillin-1- containing microfibrils provide long-term force bearing structural support. In tissues such as the lung, blood vessels and skin, microfibrils form the periphery of the elastic fibe…
17	PAPSS2	9606.ENSP00000406157	PAPSS2	Bifunctional 3'-phosphoadenosine 5'-phosphosulfate synthase 2; Bifunctional enzyme with both ATP sulfurylase and APS kinase activity, which mediates two steps in the sulfate activation pathway. The first step is the transfer of a sulfate group to ATP to yield adenosine 5'-phosphosulfate (APS), and the second step is the transfer of a phosphate group from ATP to APS yielding 3'-phosphoadenylylsulf…
18	P4HA1	9606.ENSP00000263556	P4HA1	Prolyl 4-hydroxylase subunit alpha-1; Catalyzes the post-translational formation of 4- hydroxyproline in -Xaa-Pro-Gly- sequences in collagens and other proteins; Belongs to the P4HA family
19	SPARC	9606.ENSP00000231061	SPARC	SPARC; Appears to regulate cell growth through interactions with the extracellular matrix and cytokines. Binds calcium and copper, several types of collagen, albumin, thrombospondin, PDGF and cell membranes. There are two calcium binding sites; an acidic domain that binds 5 to 8 Ca(2+) with a low affinity and an EF-hand loop that binds a Ca(2+) ion with a high affinity; SPARC family
20	COMP	9606.ENSP00000222271	COMP	Cartilage oligomeric matrix protein; May play a role in the structural integrity of cartilage via its interaction with other extracellular matrix proteins such as the collagens and fibronectin. Can mediate the interaction of chondrocytes with the cartilage extracellular matrix through interaction with cell surface integrin receptors. Could play a role in the pathogenesis of osteoarthritis. Potent…
21	CTPS2	9606.ENSP00000401264	CTPS2	CTP synthase 2; Catalyzes the ATP-dependent amination of UTP to CTP with either L-glutamine or ammonia as the source of nitrogen. Constitutes the rate-limiting enzyme in the synthesis of cytosine nucleotides
23	PLXDC2	9606.ENSP00000366460	PLXDC2	Plexin domain-containing protein 2; May play a role in tumor angiogenesis; Belongs to the plexin family
24	CFD	9606.ENSP00000332139	CFD	Complement factor D; Factor D cleaves factor B when the latter is complexed with factor C3b, activating the C3bbb complex, which then becomes the C3 convertase of the alternate pathway. Its function is homologous to that of C1s in the classical pathway; Belongs to the peptidase S1 family
25	ABRACL	9606.ENSP00000356632	ABRACL	Costars family protein ABRACL; ABRA C-terminal like; Belongs to the costars family
26	ALDH2	9606.ENSP00000261733	ALDH2	Aldehyde dehydrogenase, mitochondrial; Aldehyde dehydrogenase 2 family member; Belongs to the aldehyde dehydrogenase family
27	PFN2	9606.ENSP00000239940	PFN2	Profilin-2; Binds to actin and affects the structure of the cytoskeleton. At high concentrations, profilin prevents the polymerization of actin, whereas it enhances it at low concentrations. By binding to PIP2, it inhibits the formation of IP3 and DG
28	NAAA	9606.ENSP00000286733	NAAA	N-acylethanolamine-hydrolysing acid amidase; N-acylethanolamine-hydrolyzing acid amidase; Degrades bioactive fatty acid amides to their corresponding acids, with the following preference: N- palmitoylethanolamine > N-myristoylethanolamine > N- lauroylethanolamine = N-stearoylethanolamine > N- arachidonoylethanolamine > N-oleoylethanolamine. Also exhibits weak hydrolytic activity against the ceram…
29	PGM1	9606.ENSP00000360124	PGM1	Phosphoglucomutase-1; This enzyme participates in both the breakdown and synthesis of glucose; Belongs to the phosphohexose mutase family
30	KDELC2	9606.ENSP00000315386	KDELC2	KDEL motif-containing protein 2; Glycosyltransferase family 90; Belongs to the KDELC family
31	ACAD8	9606.ENSP00000281182	ACAD8	Isobutyryl-CoA dehydrogenase, mitochondrial; Has very high activity toward isobutyryl-CoA. Is an isobutyryl-CoA dehydrogenase that functions in valine catabolism. Plays a role in transcriptional coactivation within the ARC complex; Acyl-CoA dehydrogenase family
32	LSM3	9606.ENSP00000302160	LSM3	U6 snRNA-associated Sm-like protein LSm3; Binds specifically to the 3'-terminal U-tract of U6 snRNA; Belongs to the snRNP Sm proteins family
33	PFKM	9606.ENSP00000345771	PFKM	ATP-dependent 6-phosphofructokinase, muscle type; Catalyzes the phosphorylation of D-fructose 6-phosphate to fructose 1,6-bisphosphate by ATP, the first committing step of glycolysis; Belongs to the phosphofructokinase type A (PFKA) family. ATP-dependent PFK group I subfamily. Eukaryotic two domain clade "E" sub-subfamily
34	HLA-C	9606.ENSP00000365402	HLA-C	HLA class I histocompatibility antigen, Cw-7 alpha chain; Involved in the presentation of foreign antigens to the immune system; Belongs to the MHC class I family
35	TPPP3	9606.ENSP00000462435	TPPP3	Tubulin polymerization-promoting protein family member 3; Binds tubulin and has microtubule bundling activity. May play a role in cell proliferation and mitosis; Tubulin polymerization promoting proteins
36	SUMF2	9606.ENSP00000341938	SUMF2	Sulfatase-modifying factor 2; Lacks formyl-glycine generating activity and is unable to convert newly synthesized inactive sulfatases to their active form. Inhibits the activation of sulfatases by SUMF1
37	ITGAV	9606.ENSP00000261023	ITGAV	Integrin alpha-V; The alpha-V (ITGAV) integrins are receptors for vitronectin, cytotactin, fibronectin, fibrinogen, laminin, matrix metalloproteinase-2, osteopontin, osteomodulin, prothrombin, thrombospondin and vWF. They recognize the sequence R-G-D in a wide array of ligands. ITGAV:ITGB3 binds to fractalkine (CX3CL1) and may act as its coreceptor in CX3CR1-dependent fractalkine signaling. ITGAV…
38	PRKG1	9606.ENSP00000363092	PRKG1	cGMP-dependent protein kinase 1; Serine/threonine protein kinase that acts as key mediator of the nitric oxide (NO)/cGMP signaling pathway. GMP binding activates PRKG1, which phosphorylates serines and threonines on many cellular proteins. Numerous protein targets for PRKG1 phosphorylation are implicated in modulating cellular calcium, but the contribution of each of these targets may vary substa…
39	UAP1L1	9606.ENSP00000386935	UAP1L1	Udp-n-acetylglucosamine/udp-n-acetylgalactosamine diphosphorylase; UDP-N-acetylhexosamine pyrophosphorylase-like protein 1; UDP-N-acetylglucosamine pyrophosphorylase 1 like 1
40	NAGLU	9606.ENSP00000225927	NAGLU	Alpha-N-acetylglucosaminidase; Involved in the degradation of heparan sulfate
41	GABARAPL2	9606.ENSP00000037243	GABARAPL2	Gamma-aminobutyric acid receptor-associated protein-like 2; Ubiquitin-like modifier involved in intra-Golgi traffic. Modulates intra-Golgi transport through coupling between NSF activity and SNAREs activation. It first stimulates the ATPase activity of NSF which in turn stimulates the association with GOSR1 (By similarity). Involved in autophagy. Plays a role in mitophagy which contributes to reg…
42	SUMO3	9606.ENSP00000409666	SUMO3	Small ubiquitin-like modifier 3
43	SORT1	9606.ENSP00000256637	SORT1	Sortilin; Functions as a sorting receptor in the Golgi compartment and as a clearance receptor on the cell surface. Required for protein transport from the Golgi apparatus to the lysosomes by a pathway that is independent of the mannose-6-phosphate receptor (M6PR). Also required for protein transport from the Golgi apparatus to the endosomes. Promotes neuronal apoptosis by mediating endocytosis o…
44	FAP	9606.ENSP00000188790	FAP	Fibroblast activation protein, alpha; Prolyl endopeptidase FAP; Cell surface glycoprotein serine protease that participates in extracellular matrix degradation and involved in many cellular processes including tissue remodeling, fibrosis, wound healing, inflammation and tumor growth. Both plasma membrane and soluble forms exhibit post-proline cleaving endopeptidase activity, with a marked prefere…
45	EVPL	9606.ENSP00000301607	EVPL	Envoplakin; Component of the cornified envelope of keratinocytes. May link the cornified envelope to desmosomes and intermediate filaments; Plakins
46	CBR3	9606.ENSP00000290354	CBR3	Carbonyl reductase [NADPH] 3; Has low NADPH-dependent oxidoreductase activity towards 4-benzoylpyridine and menadione (in vitro); Belongs to the short-chain dehydrogenases/reductases (SDR) family
47	ERBB2	9606.ENSP00000269571	ERBB2	Receptor tyrosine-protein kinase erbB-2; Protein tyrosine kinase that is part of several cell surface receptor complexes, but that apparently needs a coreceptor for ligand binding. Essential component of a neuregulin-receptor complex, although neuregulins do not interact with it alone. GP30 is a potential ligand for this receptor. Regulates outgrowth and stabilization of peripheral microtubules (…
48	CTAGE5	9606.ENSP00000379462	CTAGE5	Endoplasmic reticulum export factor CTAGE5; Plays a role in the transport of cargos that are too large to fit into COPII-coated vesicles and require specific mechanisms to be incorporated into membrane-bound carriers and exported from the endoplasmic reticulum. This protein is required for collagen VII (COL7A1) secretion by loading COL7A1 into transport carriers and recruiting PREB/SEC12 at the e…
49	TP53I3	9606.ENSP00000238721	TP53I3	Tumor protein p53-inducible protein 3; Quinone oxidoreductase PIG3; May be involved in the generation of reactive oxygen species (ROS). Has low NADPH-dependent beta-naphthoquinone reductase activity, with a preference for 1,2-beta-naphthoquinone over 1,4-beta-naphthoquinone. Has low NADPH-dependent diamine reductase activity (in vitro)
50	CRELD2	9606.ENSP00000383938	CRELD2	Cysteine rich with EGF like domains 2
51	CBR1	9606.ENSP00000290349	CBR1	Carbonyl reductase [NADPH] 1; NADPH-dependent reductase with broad substrate specificity. Catalyzes the reduction of a wide variety of carbonyl compounds including quinones, prostaglandins, menadione, plus various xenobiotics. Catalyzes the reduction of the antitumor anthracyclines doxorubicin and daunorubicin to the cardiotoxic compounds doxorubicinol and daunorubicinol. Can convert prostaglandi…
52	CASP14	9606.ENSP00000393417	CASP14	Caspase-14; Non-apoptotic caspase involved in epidermal differentiation. Is the predominant caspase in epidermal stratum corneum. Seems to play a role in keratinocyte differentiation and is required for cornification. Regulates maturation of the epidermis by proteolytically processing filaggrin (By similarity). In vitro has a preference for the substrate [WY]-X-X-D motif and is active on the synt…
53	BCAM	9606.ENSP00000270233	BCAM	Basal cell adhesion molecule; Laminin alpha-5 receptor. May mediate intracellular signaling; Blood group antigens
54	DAB2	9606.ENSP00000313391	DAB2	Disabled homolog 2; Adapter protein that functions as clathrin-associated sorting protein (CLASP) required for clathrin-mediated endocytosis of selected cargo proteins. Can bind and assemble clathrin, and binds simultaneously to phosphatidylinositol 4,5-bisphosphate (PtdIns(4,5)P2) and cargos containing non-phosphorylated NPXY internalization motifs, such as the LDL receptor, to recruit them to c…
55	ITGB5	9606.ENSP00000296181	ITGB5	Integrin subunit beta 5; Integrin beta-5; Integrin alpha-V/beta-5 (ITGAV:ITGB5) is a receptor for fibronectin. It recognizes the sequence R-G-D in its ligand
56	HINT2	9606.ENSP00000259667	HINT2	Histidine triad nucleotide-binding protein 2, mitochondrial; Hydrolase probably involved in steroid biosynthesis. May play a role in apoptosis. Has adenosine phosphoramidase activity; Belongs to the HINT family
57	RDH11	9606.ENSP00000370750	RDH11	Retinol dehydrogenase 11; Exhibits an oxidoreductive catalytic activity towards retinoids. Most efficient as an NADPH-dependent retinal reductase. Displays high activity towards 9-cis and all-trans-retinol. Also involved in the metabolism of short-chain aldehydes. No steroid dehydrogenase activity detected
58	ERO1L	9606.ENSP00000379042	ERO1L	ERO1-like protein alpha; Oxidoreductase involved in disulfide bond formation in the endoplasmic reticulum. Efficiently reoxidizes P4HB/PDI, the enzyme catalyzing protein disulfide formation, in order to allow P4HB to sustain additional rounds of disulfide formation. Following P4HB reoxidation, passes its electrons to molecular oxygen via FAD, leading to the production of reactive oxygen species (…
59	CLIP1	9606.ENSP00000479322	CLIP1	CAP-Gly domain-containing linker protein 1; Binds to the plus end of microtubules and regulates the dynamics of the microtubule cytoskeleton. Promotes microtubule growth and microtubule bundling. Links cytoplasmic vesicles to microtubules and thereby plays an important role in intracellular vesicle trafficking. Plays a role macropinocytosis and endosome trafficking
60	POFUT1	9606.ENSP00000364902	POFUT1	GDP-fucose protein O-fucosyltransferase 1; Catalyzes the reaction that attaches fucose through an O-glycosidic linkage to a conserved serine or threonine residue found in the consensus sequence C2-X(4,5)-[S/T]-C3 of EGF domains, where C2 and C3 are the second and third conserved cysteines. Specifically uses GDP-fucose as donor substrate and proper disulfide pairing of the substrate EGF domains is…
61	AKT2	9606.ENSP00000375892	AKT2	RAC-beta serine/threonine-protein kinase; AKT2 is one of 3 closely related serine/threonine- protein kinases (AKT1, AKT2 and AKT3) called the AKT kinase, and which regulate many processes including metabolism, proliferation, cell survival, growth and angiogenesis. This is mediated through serine and/or threonine phosphorylation of a range of downstream substrates. Over 100 substrate candidates ha…
62	PPFIBP1	9606.ENSP00000314724	PPFIBP1	Ppfia binding protein 1; Liprin-beta-1; May regulate the disassembly of focal adhesions. Did not bind receptor-like tyrosine phosphatases type 2A; Sterile alpha motif domain containing
63	AS3MT	9606.ENSP00000358896	AS3MT	Arsenite methyltransferase; Catalyzes the transfer of a methyl group from AdoMet to trivalent arsenicals producing methylated and dimethylated arsenicals. It methylates arsenite to form methylarsonate, Me- AsO(3)H(2), which is reduced by methylarsonate reductase to methylarsonite, Me-As(OH)2. Methylarsonite is also a substrate and it is converted into the much less toxic compound dimethylarsinate…
64	ISG15	9606.ENSP00000368699	ISG15	Ubiquitin cross-reactive protein; Ubiquitin-like protein ISG15; Ubiquitin-like protein which plays a key role in the innate immune response to viral infection either via its conjugation to a target protein (ISGylation) or via its action as a free or unconjugated protein. ISGylation involves a cascade of enzymatic reactions involving E1, E2, and E3 enzymes which catalyze the conjugation of ISG15 t…
65	CYB5A	9606.ENSP00000341625	CYB5A	Cytochrome b5 type a; Cytochrome b5; Cytochrome b5 is a membrane bound hemoprotein which function as an electron carrier for several membrane bound oxygenases
66	GATM	9606.ENSP00000379895	GATM	Glycine amidinotransferase, mitochondrial; Catalyzes the biosynthesis of guanidinoacetate, the immediate precursor of creatine. Creatine plays a vital role in energy metabolism in muscle tissues. May play a role in embryonic and central nervous system development. May be involved in the response to heart failure by elevating local creatine synthesis; Belongs to the amidinotransferase family
67	ADA	9606.ENSP00000361965	ADA	Adenosine deaminase; Catalyzes the hydrolytic deamination of adenosine and 2- deoxyadenosine. Plays an important role in purine metabolism and in adenosine homeostasis. Modulates signaling by extracellular adenosine, and so contributes indirectly to cellular signaling events. Acts as a positive regulator of T-cell coactivation, by binding DPP4. Its interaction with DPP4 regulates lymphocyte- epit…
68	NXN	9606.ENSP00000337443	NXN	Nucleoredoxin; Functions as a redox-dependent negative regulator of the Wnt signaling pathway, possibly by preventing ubiquitination of DVL3 by the BCR(KLHL12) complex. May also function as a transcriptional regulator act as a regulator of protein phosphatase 2A (PP2A) (By similarity); Nucleoredoxin family
69	SPON1	9606.ENSP00000460236	SPON1	Spondin-1; Cell adhesion protein that promotes the attachment of spinal cord and sensory neuron cells and the outgrowth of neurites in vitro. May contribute to the growth and guidance of axons in both the spinal cord and the PNS (By similarity). Major factor for vascular smooth muscle cell
70	SDF2L1	9606.ENSP00000248958	SDF2L1	Stromal cell-derived factor 2-like protein 1; Stromal cell derived factor 2 like 1
71	AASDHPPT	9606.ENSP00000278618	AASDHPPT	L-aminoadipate-semialdehyde dehydrogenase-phosphopantetheinyl transferase; Catalyzes the post-translational modification of target proteins by phosphopantetheine. Can transfer the 4'- phosphopantetheine moiety from coenzyme A to a serine residue of a broad range of acceptors, such as the acyl carrier domain of FASN
72	LSM7	9606.ENSP00000252622	LSM7	U6 snRNA-associated Sm-like protein LSm7; Binds specifically to the 3'-terminal U-tract of U6 snRNA and is probably a component of the spliceosome; Belongs to the snRNP Sm proteins family
73	CASK	9606.ENSP00000367408	CASK	Peripheral plasma membrane protein CASK; Multidomain scaffolding protein with a role in synaptic transmembrane protein anchoring and ion channel trafficking. Contributes to neural development and regulation of gene expression via interaction with the transcription factor TBR1. Binds to cell-surface proteins, including amyloid precursor protein, neurexins and syndecans. May mediate a link between …
74	RBP1	9606.ENSP00000232219	RBP1	Retinol-binding protein 1; Cytoplasmic retinol-binding protein. Accepts retinol from the transport protein STRA6, and thereby contributes to retinol uptake, storage and retinoid homeostasis; Belongs to the calycin superfamily. Fatty-acid binding protein (FABP) family
75	RAB23	9606.ENSP00000417610	RAB23	RAB23, member RAS oncogene family; Ras-related protein Rab-23; The small GTPases Rab are key regulators of intracellular membrane trafficking, from the formation of transport vesicles to their fusion with membranes. Rabs cycle between an inactive GDP-bound form and an active GTP-bound form that is able to recruit to membranes different set of downstream effectors directly responsible for vesicle …
76	HTATIP2	9606.ENSP00000392985	HTATIP2	Oxidoreductase HTATIP2; Oxidoreductase required for tumor suppression. NAPDH- bound form inhibits nuclear import by competing with nuclear import substrates for binding to a subset of nuclear transport receptors. May act as a redox sensor linked to transcription through regulation of nuclear import. Isoform 1 is a metastasis suppressor with proapoptotic as well as antiangiogenic properties. Isofo…
77	PXDN	9606.ENSP00000252804	PXDN	Peroxidasin homolog; Displays low peroxidase activity and is likely to participate in H(2)O(2) metabolism and peroxidative reactions in the cardiovascular system. Plays a role in extracellular matrix formation; I-set domain containing
78	ATE1	9606.ENSP00000224652	ATE1	Arginyl-tRNA--protein transferase 1; Involved in the post-translational conjugation of arginine to the N-terminal aspartate or glutamate of a protein. This arginylation is required for degradation of the protein via the ubiquitin pathway. Does not arginylate cysteine residues (By similarity)
79	CST3	9606.ENSP00000381448	CST3	Cystatin-C; As an inhibitor of cysteine proteinases, this protein is thought to serve an important physiological role as a local regulator of this enzyme activity; Belongs to the cystatin family
80	PLTP	9606.ENSP00000417138	PLTP	Phospholipid transfer protein; Facilitates the transfer of a spectrum of different lipid molecules, including diacylglycerol, phosphatidic acid, sphingomyelin, phosphatidylcholine, phosphatidylglycerol, cerebroside and phosphatidyl ethanolamine. Essential for the transfer of excess surface lipids from triglyceride-rich lipoproteins to HDL, thereby facilitating the formation of smaller lipoprotein…
81	GANAB	9606.ENSP00000340466	GANAB	Mannosyl-oligosaccharide alpha-1,3-glucosidase; Neutral alpha-glucosidase AB; Cleaves sequentially the 2 innermost alpha-1,3-linked glucose residues from the Glc(2)Man(9)GlcNAc(2) oligosaccharide precursor of immature glycoproteins. Required for PKD1/Polycystin-1 and PKD2/Polycystin-2 maturation and localization to the cell surface and cilia; Belongs to the glycosyl hydrolase 31 family
82	IFT27	9606.ENSP00000393541	IFT27	Intraflagellar transport protein 27 homolog; Small GTPase-like component of the intraflagellar transport (IFT) complex B that promotes the exit of the BBSome complex from cilia via its interaction with ARL6. Not involved in entry of the BBSome complex into cilium. Prevents aggregation of GTP-free ARL6. Required for hedgehog signaling. Forms a subcomplex within the IFT complex B with IFT25 (By sim…
83	LMAN1	9606.ENSP00000251047	LMAN1	Lectin, mannose binding 1; Protein ERGIC-53; Mannose-specific lectin. May recognize sugar residues of glycoproteins, glycolipids, or glycosylphosphatidyl inositol anchors and may be involved in the sorting or recycling of proteins, lipids, or both. The LMAN1-MCFD2 complex forms a specific cargo receptor for the ER-to-Golgi transport of selected proteins
84	AAMDC	9606.ENSP00000431808	AAMDC	Mth938 domain-containing protein; May play a role in preadipocyte differentiation and adipogenesis; Belongs to the AAMDC family
85	FKBP10	9606.ENSP00000317232	FKBP10	Peptidyl-prolyl cis-trans isomerase FKBP10; PPIases accelerate the folding of proteins during protein synthesis; EF-hand domain containing
86	BIRC6	9606.ENSP00000393596	BIRC6	Baculoviral IAP repeat-containing protein 6; Anti-apoptotic protein which can regulate cell death by controlling caspases and by acting as an E3 ubiquitin-protein ligase. Has an unusual ubiquitin conjugation system in that it could combine in a single polypeptide, ubiquitin conjugating (E2) with ubiquitin ligase (E3) activity, forming a chimeric E2/E3 ubiquitin ligase. Its tragets include CASP9 a…
87	LRRC15	9606.ENSP00000413707	LRRC15	Leucine-rich repeat-containing protein 15; Leucine rich repeat containing 15
88	RAB31	9606.ENSP00000461945	RAB31	RAB31, member RAS oncogene family; Ras-related protein Rab-31; The small GTPases Rab are key regulators of intracellular membrane trafficking, from the formation of transport vesicles to their fusion with membranes. Rabs cycle between an inactive GDP-bound form and an active GTP-bound form that is able to recruit to membranes different set of downstream effectors directly responsible for vesicle …
89	P4HA2	9606.ENSP00000384999	P4HA2	Prolyl 4-hydroxylase subunit alpha-2; Catalyzes the post-translational formation of 4- hydroxyproline in -Xaa-Pro-Gly- sequences in collagens and other proteins
90	FKBP7	9606.ENSP00000413152	FKBP7	FK506-binding protein 7; PPIases accelerate the folding of proteins during protein synthesis
91	GUSB	9606.ENSP00000302728	GUSB	Beta-glucuronidase; Plays an important role in the degradation of dermatan and keratan sulfates; Belongs to the glycosyl hydrolase 2 family
92	COL11A1	9606.ENSP00000359114	COL11A1	Collagen alpha-1(XI) chain; May play an important role in fibrillogenesis by controlling lateral growth of collagen II fibrils; Collagens
93	ADAM10	9606.ENSP00000260408	ADAM10	Disintegrin and metalloproteinase domain-containing protein 10; Cleaves the membrane-bound precursor of TNF-alpha at '76-Ala-|-Val-77' to its mature soluble form. Responsible for the proteolytical release of soluble JAM3 from endothelial cells surface. Responsible for the proteolytic release of several other cell-surface proteins, including heparin-binding epidermal growth-like factor, ephrin-A2,…
94	SLC12A2	9606.ENSP00000262461	SLC12A2	Solute carrier family 12 member 2; Electrically silent transporter system. Mediates sodium and chloride reabsorption. Plays a vital role in the regulation of ionic balance and cell volume; Belongs to the SLC12A transporter family
95	PDIA4	9606.ENSP00000286091	PDIA4	Protein disulfide-isomerase A4; Protein disulfide isomerase family A member 4; Belongs to the protein disulfide isomerase family
96	ALDH1L2	9606.ENSP00000258494	ALDH1L2	Mitochondrial 10-formyltetrahydrofolate dehydrogenase; Aldehyde dehydrogenase 1 family member L2; In the N-terminal section; belongs to the GART family
97	LGALS3BP	9606.ENSP00000262776	LGALS3BP	Galectin-3-binding protein; Promotes integrin-mediated cell adhesion. May stimulate host defense against viruses and tumor cells; BTB domain containing
98	PON2	9606.ENSP00000222572	PON2	Serum paraoxonase/arylesterase 2; Capable of hydrolyzing lactones and a number of aromatic carboxylic acid esters. Has antioxidant activity. Is not associated with high density lipoprotein. Prevents LDL lipid peroxidation, reverses the oxidation of mildly oxidized LDL, and inhibits the ability of MM-LDL to induce monocyte chemotaxis; Paraoxonases
99	MRC2	9606.ENSP00000307513	MRC2	C-type mannose receptor 2; May play a role as endocytotic lectin receptor displaying calcium-dependent lectin activity. Internalizes glycosylated ligands from the extracellular space for release in an endosomal compartment via clathrin-mediated endocytosis. May be involved in plasminogen activation system controlling the extracellular level of PLAUR/PLAU, and thus may regulate protease activity a…
100	PTGFRN	9606.ENSP00000376899	PTGFRN	Prostaglandin F2 receptor negative regulator; Inhibits the binding of prostaglandin F2-alpha (PGF2- alpha) to its specific FP receptor, by decreasing the receptor number rather than the affinity constant. Functional coupling with the prostaglandin F2-alpha receptor seems to occur (By similarity); CD molecules
101	LEPRE1	9606.ENSP00000236040	LEPRE1	Procollagen-proline 3-dioxygenase 1; Prolyl 3-hydroxylase 1; Basement membrane-associated chondroitin sulfate proteoglycan (CSPG). Has prolyl 3-hydroxylase activity catalyzing the post-translational formation of 3-hydroxyproline in -Xaa-Pro- Gly- sequences in collagens, especially types IV and V. May be involved in the secretory pathway of cells. Has growth suppressive activity in fibroblasts
102	ALCAM	9606.ENSP00000305988	ALCAM	CD166 antigen; Cell adhesion molecule that mediates both heterotypic cell-cell contacts via its interaction with CD6, as well as homotypic cell-cell contacts. Promotes T-cell activation and proliferation via its interactions with CD6. Contributes to the formation and maturation of the immunological synapse via its interactions with CD6. Mediates homotypic interactions with cells that express ALCA…
103	PPIC	9606.ENSP00000303057	PPIC	Peptidyl-prolyl cis-trans isomerase C; PPIases accelerate the folding of proteins. It catalyzes the cis-trans isomerization of proline imidic peptide bonds in oligopeptides; Cyclophilin peptidylprolyl isomerases
105	HYOU1	9606.ENSP00000480150	HYOU1	Hypoxia up-regulated protein 1; Has a pivotal role in cytoprotective cellular mechanisms triggered by oxygen deprivation. May play a role as a molecular chaperone and participate in protein folding; Belongs to the heat shock protein 70 family
106	CRTAP	9606.ENSP00000323696	CRTAP	Cartilage-associated protein; Necessary for efficient 3-hydroxylation of fibrillar collagen prolyl residues; Belongs to the leprecan family
107	NAMPT	9606.ENSP00000222553	NAMPT	Nicotinamide phosphoribosyltransferase; Catalyzes the condensation of nicotinamide with 5- phosphoribosyl-1-pyrophosphate to yield nicotinamide mononucleotide, an intermediate in the biosynthesis of NAD. It is the rate limiting component in the mammalian NAD biosynthesis pathway. The secreted form behaves both as a cytokine with immunomodulating properties and an adipokine with anti-diabetic prop…
108	COL5A1	9606.ENSP00000360882	COL5A1	Collagen alpha-1(V) chain; Type V collagen is a member of group I collagen (fibrillar forming collagen). It is a minor connective tissue component of nearly ubiquitous distribution. Type V collagen binds to DNA, heparan sulfate, thrombospondin, heparin, and insulin; Collagens
109	B4GALT1	9606.ENSP00000369055	B4GALT1	Beta-1,4-galactosyltransferase 1; The Golgi complex form catalyzes the production of lactose in the lactating mammary gland and could also be responsible for the synthesis of complex-type N-linked oligosaccharides in many glycoproteins as well as the carbohydrate moieties of glycolipids; Beta 4-glycosyltransferases
110	BLVRA	9606.ENSP00000385757	BLVRA	Biliverdin reductase A; Reduces the gamma-methene bridge of the open tetrapyrrole, biliverdin IX alpha, to bilirubin with the concomitant oxidation of a NADH or NADPH cofactor; Belongs to the Gfo/Idh/MocA family. Biliverdin reductase subfamily

## Sheet: RTCM_Down
#term ID	term description	observed gene count	background gene count	strength	false discovery rate	matching proteins in your network (IDs)	matching proteins in your network (labels)
HSA-1474244	Extracellular matrix organization	15	301	0.96	4.35e-07	9606.ENSP00000218388,9606.ENSP00000222271,9606.ENSP00000231061,9606.ENSP00000236040,9606.ENSP00000252804,9606.ENSP00000260408,9606.ENSP00000261023,9606.ENSP00000263556,9606.ENSP00000296181,9606.ENSP00000323696,9606.ENSP00000325527,9606.ENSP00000359114,9606.ENSP00000360882,9606.ENSP00000367408,9606.ENSP00000384999	TIMP1,COMP,SPARC,LEPRE1,PXDN,ADAM10,ITGAV,P4HA1,ITGB5,CRTAP,FBN1,COL11A1,COL5A1,CASK,P4HA2
HSA-1474290	Collagen formation	7	90	1.15	0.0011	9606.ENSP00000236040,9606.ENSP00000252804,9606.ENSP00000263556,9606.ENSP00000323696,9606.ENSP00000359114,9606.ENSP00000360882,9606.ENSP00000384999	LEPRE1,PXDN,P4HA1,CRTAP,COL11A1,COL5A1,P4HA2
HSA-1650814	Collagen biosynthesis and modifying enzymes	6	67	1.21	0.0022	9606.ENSP00000236040,9606.ENSP00000263556,9606.ENSP00000323696,9606.ENSP00000359114,9606.ENSP00000360882,9606.ENSP00000384999	LEPRE1,P4HA1,CRTAP,COL11A1,COL5A1,P4HA2
HSA-3000170	Syndecan interactions	4	27	1.43	0.0131	9606.ENSP00000261023,9606.ENSP00000296181,9606.ENSP00000360882,9606.ENSP00000367408	ITGAV,ITGB5,COL5A1,CASK
HSA-3000171	Non-integrin membrane-ECM interactions	5	59	1.19	0.0131	9606.ENSP00000261023,9606.ENSP00000296181,9606.ENSP00000359114,9606.ENSP00000360882,9606.ENSP00000367408	ITGAV,ITGB5,COL11A1,COL5A1,CASK
HSA-1430728	Metabolism	26	2089	0.35	0.0215	9606.ENSP00000222553,9606.ENSP00000222572,9606.ENSP00000225927,9606.ENSP00000232219,9606.ENSP00000243077,9606.ENSP00000258494,9606.ENSP00000261733,9606.ENSP00000278618,9606.ENSP00000281182,9606.ENSP00000290349,9606.ENSP00000290354,9606.ENSP00000302728,9606.ENSP00000341625,9606.ENSP00000341938,9606.ENSP00000345771,9606.ENSP00000358896,9606.ENSP00000360021,9606.ENSP00000360124,9606.ENSP00000361965,…	NAMPT,PON2,NAGLU,RBP1,LRP1,ALDH1L2,ALDH2,AASDHPPT,ACAD8,CBR1,CBR3,GUSB,CYB5A,SUMF2,PFKM,AS3MT,GNG12,PGM1,ADA,B4GALT1,RDH11,GATM,BLVRA,CTPS2,PAPSS2,NDUFAB1
HSA-114608	Platelet degranulation	6	127	0.93	0.0259	9606.ENSP00000218388,9606.ENSP00000231061,9606.ENSP00000249842,9606.ENSP00000262776,9606.ENSP00000332139,9606.ENSP00000358045	TIMP1,SPARC,ISLR,LGALS3BP,CFD,ECM1
HSA-196854	Metabolism of vitamins and cofactors	7	189	0.83	0.0259	9606.ENSP00000222553,9606.ENSP00000232219,9606.ENSP00000243077,9606.ENSP00000258494,9606.ENSP00000278618,9606.ENSP00000341625,9606.ENSP00000370750	NAMPT,RBP1,LRP1,ALDH1L2,AASDHPPT,CYB5A,RDH11
HSA-3000178	ECM proteoglycans	5	76	1.08	0.0259	9606.ENSP00000222271,9606.ENSP00000231061,9606.ENSP00000261023,9606.ENSP00000296181,9606.ENSP00000360882	COMP,SPARC,ITGAV,ITGB5,COL5A1
HSA-216083	Integrin cell surface interactions	5	85	1.03	0.0272	9606.ENSP00000222271,9606.ENSP00000261023,9606.ENSP00000296181,9606.ENSP00000325527,9606.ENSP00000360882	COMP,ITGAV,ITGB5,FBN1,COL5A1
